# Supplementary material
Source: PubMed Central journal article supplement (PMC10836586)
Supplement: ehp13882.s001.acco.pdf [file ehp13882.s001.acco.pdf]

**Note to readers with disabilities:** *EHP* strives to ensure that all journal content is accessible to all readers. However, some figures and Supplemental Material published in *EHP* articles may not conform to [508 standards](#) due to the complexity of the information being presented. If you need assistance accessing journal content, please contact [ehp508@niehs.nih.gov](mailto:ehp508@niehs.nih.gov). Our staff will work with you to assess and meet your accessibility needs within 3 working days.

### **Supplemental Material**

#### **Personal Care Product Use during Puberty and Incident Breast Cancer among Black, Hispanic/Latina, and White Women in a Prospective US-Wide Cohort**

Mandy Goldberg, Che-Jung Chang, Kemi Ogunshina, Katie M. O'Brien, Kyla W. Taylor, Alexandra J. White, and Dale P. Sandler

#### **Table of Contents**

**Table S1.** Indicators of fit for race and ethnicity-specific latent class models of self-reported beauty, hair, and skincare/hygiene product use during the ages of 10 to 13 years in the Sister Study.

**Table S2.** Missing data on self-reported use of each personal care product during the ages of 10 to 13 years among Black or African American, non-Black Hispanic/Latina, and non-Hispanic White women in the Sister Study.

**Table S3.** Participant characteristics among eligible Black or African American, non-Black Hispanic/Latina, and non-Hispanic White participants and those excluded from the analyses in the Sister Study.

**Table S4.** Associations between latent classes of self-reported personal care product use during the ages of 10 to 13 years and incident breast cancer among Black or African American, non-Black Hispanic/Latina, and non-Hispanic White women in the Sister Study with additional adjustment for age at thelarche and weight relative to peers at age 10 years.

**Table S5.** Associations between race- and ethnicity-specific latent classes of self-reported personal care product use during the ages of 10 to 13 years and incident breast cancer by menopausal status in the Sister Study.

**Table S6.** Associations between race- and ethnicity-specific latent classes of self-reported personal care product use during the ages of 10 to 13 years and incident breast cancer by estrogen receptor (ER) status in the Sister Study.

**Table S7.** Associations between race- and ethnicity-specific latent classes of self-reported personal care product use during the ages of 10 to 13 years and incident breast cancer by tumor invasiveness in the Sister Study.

**Table S8.** Associations between latent classes of self-reported personal care product use during the ages of 10 to 13 years and incident breast cancer by timing of thelarche among non-Hispanic White women in the Sister Study.

**Table S9.** Associations between self-reported use of single beauty products during the ages of 10 to 13 years and incident breast cancer by race and ethnicity in the Sister Study, additionally adjusted for number of beauty products used during the ages of 10 to 13 years to address confounding by co-exposure to other products.

**Table S10.** Associations between self-reported use of single hair products during the ages of 10 to 13 years and incident breast cancer by race and ethnicity in the Sister Study, additionally adjusted for number of hair products used during the ages of 10 to 13 years to address confounding by co-exposure to other products.

**Table S11.** Associations between self-reported use of single skincare/hygiene products during the ages of 10 to 13 years and incident breast cancer by race and ethnicity in the Sister Study, additionally adjusted for number of skincare/hygiene products used during the ages of 10 to 13 years to address confounding by co-exposure to other products.

**Table S12.** Sensitivity analyses for the associations between self-reported latent classes of product use and use of individual products during the ages of 10 to 13 years with incident breast cancer among Black or African American participants in the Sister Study, restricted to participants who identify as monoracial and non-Latina (n=3,697).

**Figure S1.** Flow chart of eligible Sister Study participants for this analysis.

**Figure S2.** Heatmap of Spearman correlation coefficients ( $\rho$ ) between self-reported frequency of personal care product use during the ages of 10 to 13 years and covariates by race and ethnicity in the Sister Study.

**Figure S3.** Spearman correlation coefficient matrix for self-reported frequency of personal care product use during the ages of 10 to 13 years among Black or African American Sister Study participants (n=4,049).

**Figure S4.** Spearman correlation coefficient matrix for self-reported frequency of personal care product use during the ages of 10 to 13 years among non-Black Hispanic/Latina Sister Study participants (n=2,104).

**Figure S5.** Spearman correlation coefficient matrix for self-reported frequency of personal care product use during the ages of 10 to 13 years among non-Hispanic White Sister Study participants (n=39,312).

**Figure S6.** Item response probabilities from selected latent class models of self-reported beauty, hair, and skincare/hygiene product use during the ages of 10 to 13 years among Black or African American Sister Study participants (n=4,049).

**Figure S7.** Item response probabilities from selected latent class models of self-reported beauty, hair, and skincare/hygiene product use during the ages of 10 to 13 years among non-Black Hispanic/Latina Sister Study participants (n=2,104).

**Figure S8.** Item response probabilities from selected latent class models of self-reported beauty, hair, and skincare/hygiene product use during the ages of 10 to 13 years among non-Hispanic White Sister Study participants (n=39,312).

**Additional File-** Excel Document

**Table S1. Indicators of fit for race and ethnicity-specific latent class models of self-reported beauty, hair, and skincare/hygiene product use during the ages of 10 to 13 years in the Sister Study**

| Model by racial and ethnic group, product type, and number of classes | AIC             | BIC             | Entropy     | Smallest Gamma estimate (class membership probability) | Products included in LCA                                                                                                                                                                                                                                                                                              |
|-----------------------------------------------------------------------|-----------------|-----------------|-------------|--------------------------------------------------------|-----------------------------------------------------------------------------------------------------------------------------------------------------------------------------------------------------------------------------------------------------------------------------------------------------------------------|
| <i>Black or African American women (n=4,049)</i>                      |                 |                 |             |                                                        |                                                                                                                                                                                                                                                                                                                       |
| Beauty product classes                                                |                 |                 |             |                                                        |                                                                                                                                                                                                                                                                                                                       |
| 2                                                                     | 7069.65         | 7290.37         | 0.90        | 0.36                                                   | Mascara <sup>b</sup> , Eye shadow <sup>b</sup> , Eye liner <sup>b</sup> , Lipstick, Lip moisturizer, Foundation <sup>b</sup> , Blush <sup>b</sup> , Makeup remover <sup>b</sup> , Nail polish, Nail polish remover, Cuticle cream <sup>b</sup> , Perfume                                                              |
| 3                                                                     | 4257.34         | 4591.57         | 0.90        | 0.10                                                   |                                                                                                                                                                                                                                                                                                                       |
| <b>4</b>                                                              | <b>3261.14</b>  | <b>3708.88</b>  | <b>0.91</b> | <b>0.07</b>                                            |                                                                                                                                                                                                                                                                                                                       |
| 5 <sup>a</sup>                                                        | 3048.37         | 3609.63         | 0.91        | 0.03                                                   |                                                                                                                                                                                                                                                                                                                       |
| 6 <sup>a</sup>                                                        | 2901.73         | 3576.50         | 0.91        | 0.02                                                   |                                                                                                                                                                                                                                                                                                                       |
| Hair product classes <sup>c</sup>                                     |                 |                 |             |                                                        |                                                                                                                                                                                                                                                                                                                       |
| 2                                                                     | 1036.16         | 1168.53         | 0.69        | 0.50                                                   |                                                                                                                                                                                                                                                                                                                       |
| <b>3</b>                                                              | <b>696.88</b>   | <b>898.58</b>   | <b>0.62</b> | <b>0.23</b>                                            | Shampoo, conditioner, hair spray <sup>b</sup> , hair gel <sup>b</sup> , pomade, hair food                                                                                                                                                                                                                             |
| 4 <sup>a</sup>                                                        | 456.87          | 727.91          | 0.62        | 0.18                                                   |                                                                                                                                                                                                                                                                                                                       |
| 5 <sup>a</sup>                                                        | 402.82          | 743.19          | 0.67        | 0.05                                                   |                                                                                                                                                                                                                                                                                                                       |
| Skincare/hygiene product classes                                      |                 |                 |             |                                                        |                                                                                                                                                                                                                                                                                                                       |
| 2                                                                     | 30278.92        | 30676.21        | 0.70        | 0.48                                                   | Body lotion, hand lotion, foot cream, baby oil, petroleum jelly, skin lightener <sup>b</sup> , bath gel, shaving cream <sup>b</sup> , deodorant, face cream, cleansing cream, face mask <sup>b</sup> , acne product, mouthwash, talcum powder under arms, talcum powder on genital area, talcum powder on other areas |
| 3                                                                     | 29019.20        | 29618.29        | 0.71        | 0.28                                                   |                                                                                                                                                                                                                                                                                                                       |
| <b>4</b>                                                              | <b>28184.17</b> | <b>28985.06</b> | <b>0.69</b> | <b>0.19</b>                                            |                                                                                                                                                                                                                                                                                                                       |
| 5                                                                     | 27564.36        | 28567.05        | 0.69        | 0.14                                                   |                                                                                                                                                                                                                                                                                                                       |
| 6 <sup>a</sup>                                                        | 27233.38        | 28437.87        | 0.69        | 0.09                                                   |                                                                                                                                                                                                                                                                                                                       |
| <i>Non-Black Hispanic/Latina women (n=2,104)</i>                      |                 |                 |             |                                                        |                                                                                                                                                                                                                                                                                                                       |
| Beauty product classes                                                |                 |                 |             |                                                        |                                                                                                                                                                                                                                                                                                                       |
| 2                                                                     | 6957.16         | 7211.48         | 0.92        | 0.24                                                   | Mascara, Eye shadow, Eye liner, Lipstick, Lip moisturizer, Foundation, Blush, Makeup remover <sup>b</sup> , Nail polish, Nail polish remover, Cuticle cream <sup>b</sup> , Perfume                                                                                                                                    |
| 3 <sup>a</sup>                                                        | 6502.03         | 6886.34         | 0.93        | 0.07                                                   |                                                                                                                                                                                                                                                                                                                       |
| <b>4<sup>a</sup></b>                                                  | <b>4784.70</b>  | <b>5298.99</b>  | <b>0.92</b> | <b>0.06</b>                                            |                                                                                                                                                                                                                                                                                                                       |
| 5 <sup>a</sup>                                                        | 4501.92         | 5146.20         | 0.92        | 0.04                                                   |                                                                                                                                                                                                                                                                                                                       |
| 6 <sup>a</sup>                                                        | 4242.71         | 5016.98         | 0.91        | 0.04                                                   |                                                                                                                                                                                                                                                                                                                       |
| Hair product classes <sup>d</sup>                                     |                 |                 |             |                                                        |                                                                                                                                                                                                                                                                                                                       |
| 2 <sup>a</sup>                                                        | 895.64          | 1025.53         | 0.71        | 0.40                                                   |                                                                                                                                                                                                                                                                                                                       |
| <b>3<sup>a</sup></b>                                                  | <b>711.86</b>   | <b>909.52</b>   | <b>0.62</b> | <b>0.24</b>                                            | Shampoo, conditioner, hair spray, hair gel, pomade, hair food <sup>b</sup>                                                                                                                                                                                                                                            |
| 4 <sup>a</sup>                                                        | 545.90          | 811.33          | 0.66        | 0.13                                                   |                                                                                                                                                                                                                                                                                                                       |
| 5 <sup>a</sup>                                                        | 420.44          | 753.63          | 0.69        | 0.06                                                   |                                                                                                                                                                                                                                                                                                                       |
| Skincare/hygiene product classes <sup>e</sup>                         |                 |                 |             |                                                        |                                                                                                                                                                                                                                                                                                                       |
| 2                                                                     | 14941.32        | 15308.58        | 0.79        | 0.44                                                   | Body lotion, hand lotion, foot cream, baby oil, petroleum jelly, self-tanning products <sup>b</sup> , bath gel, shaving cream, deodorant, face cream, cleansing cream, face mask <sup>b</sup> , acne product, mouthwash, talcum powder under arms, talcum powder                                                      |
| 3                                                                     | 14302.45        | 14856.16        | 0.76        | 0.23                                                   |                                                                                                                                                                                                                                                                                                                       |
| <b>4</b>                                                              | <b>13794.19</b> | <b>14534.36</b> | <b>0.77</b> | <b>0.19</b>                                            |                                                                                                                                                                                                                                                                                                                       |
| 5                                                                     | 13523.62        | 14450.25        | 0.77        | 0.13                                                   |                                                                                                                                                                                                                                                                                                                       |



|                                               |                  |                  |             |             |                                                               |
|-----------------------------------------------|------------------|------------------|-------------|-------------|---------------------------------------------------------------|
| 6 <sup>a</sup>                                | 13367.56         | 14480.65         | 0.78        | 0.09        | on genital area, talcum powder on other areas                 |
| <i>Non-Hispanic White women (n=39,312)</i>    |                  |                  |             |             |                                                               |
| Beauty product classes <sup>f</sup>           |                  |                  |             |             |                                                               |
| 2                                             | 81896.05         | 82247.80         | 0.91        | 0.25        | Mascara, Eye shadow, Eye liner <sup>b</sup> ,                 |
| <b>3</b>                                      | <b>42683.60</b>  | <b>43215.51</b>  | <b>0.92</b> | <b>0.21</b> | Lipstick, Lip moisturizer,                                    |
| 4                                             | 36420.27         | 37132.34         | 0.93        | 0.03        | Foundation <sup>b</sup> , Blush, Makeup                       |
| 5 <sup>a</sup>                                | 30056.89         | 30949.12         | 0.92        | 0.03        | remover <sup>b</sup> , Nail polish, Nail polish               |
| 6 <sup>a</sup>                                | 26271.45         | 27343.84         | 0.94        | 0.02        | remover, Cuticle cream <sup>b</sup> , Perfume                 |
| Hair product classes <sup>g</sup>             |                  |                  |             |             |                                                               |
| 2                                             | 3121.16          | 3249.82          | 0.58        | 0.32        | Shampoo <sup>h</sup> , conditioner, hair spray,               |
| 3                                             | 2105.46          | 2302.75          | 0.61        | 0.07        | hair gel                                                      |
| <b>4<sup>a</sup></b>                          | <b>427.53</b>    | <b>693.44</b>    | <b>0.70</b> | <b>0.08</b> |                                                               |
| Skincare/hygiene product classes <sup>i</sup> |                  |                  |             |             |                                                               |
| 2                                             | 132428.55        | 132934.72        | 0.76        | 0.47        | Body lotion, hand lotion, foot                                |
| 3                                             | 121377.70        | 122141.25        | 0.71        | 0.20        | cream <sup>b</sup> , baby oil, petroleum jelly <sup>b</sup> , |
| <b>4</b>                                      | <b>112412.36</b> | <b>113433.28</b> | <b>0.73</b> | <b>0.16</b> | self-tanning products <sup>b</sup> , bath gel <sup>b</sup> ,  |
| 5 <sup>a</sup>                                | 107992.02        | 109270.32        | 0.74        | 0.08        | shaving cream, deodorant, face                                |
| 6 <sup>a</sup>                                | 104230.12        | 105765.79        | 0.72        | 0.08        | cream, cleansing cream, face                                  |
|                                               |                  |                  |             |             | mask <sup>b</sup> , acne product, mouthwash,                  |
|                                               |                  |                  |             |             | talcum powder under arms, talcum                              |
|                                               |                  |                  |             |             | powder on genital area, talcum                                |
|                                               |                  |                  |             |             | powder on other areas                                         |

AIC: Akaike Information Criterion; BIC: Bayesian Information Criterion; LCA: Latent Class Analysis

**Bold font** indicates final model selected for use as primary exposure construct for breast cancer incidence analysis

<sup>a</sup>A data-derived prior was applied to model estimation of rho parameters to help avoid parameter estimates on the boundary of zero and one

<sup>b</sup>3-category variable was dichotomized for LCA into ever use (frequently or sometimes use) vs. did not use

<sup>c</sup>12 Black women missing data on all included hair products were excluded from LCA and breast cancer analyses

<sup>d</sup>9 Latina women missing data on all included hair products were excluded from LCA and breast cancer analyses

<sup>e</sup>3 Latina women missing data on all included skincare/hygiene products were excluded from LCA and breast cancer analyses

<sup>f</sup>7 White women missing data on all included beauty products were excluded from LCA and breast cancer analyses

<sup>g</sup>60 White women missing data on all included hair products were excluded from LCA and breast cancer analyses

<sup>h</sup>3-category variable was dichotomized for LCA into frequently used vs. infrequently used (sometimes or did not use)

<sup>i</sup>5 White women missing data on all included skincare/hygiene products were excluded from LCA and breast cancer analyses

**Table S2. Missing data on self-reported use of each personal care product during the ages of 10 to 13 years among Black or African American, non-Black Hispanic/Latina, and non-Hispanic White women in the Sister Study**

| Product                                                                            | Black or African American (n=4,049)<br>n (%) missing | Non-Black Hispanic/Latina (n=2,104)<br>n (%) missing | Non-Hispanic White (n=39,312)<br>n (%) missing |
|------------------------------------------------------------------------------------|------------------------------------------------------|------------------------------------------------------|------------------------------------------------|
| <i>Beauty products</i>                                                             |                                                      |                                                      |                                                |
| Mascara                                                                            | 42 (1.0)                                             | 33 (1.6)                                             | 467 (1.2)                                      |
| Eye shadow                                                                         | 29 (0.7)                                             | 26 (1.2)                                             | 383 (1.0)                                      |
| Eye liner                                                                          | 48 (1.2)                                             | 20 (1.0)                                             | 518 (1.3)                                      |
| Lipstick                                                                           | 72 (1.8)                                             | 32 (1.5)                                             | 710 (1.8)                                      |
| Lip moisturizer                                                                    | 162 (4.0)                                            | 65 (3.1)                                             | 1959 (5.0)                                     |
| Foundation                                                                         | 47 (1.2)                                             | 23 (1.1)                                             | 542 (1.4)                                      |
| Blush or rouge                                                                     | 57 (1.4)                                             | 29 (1.4)                                             | 675 (1.7)                                      |
| Makeup remover                                                                     | 32 (0.8)                                             | 33 (1.6)                                             | 474 (1.2)                                      |
| Nail polish                                                                        | 217 (5.4)                                            | 114 (5.4)                                            | 2006 (5.1)                                     |
| Nail polish remover                                                                | 233 (5.8)                                            | 119 (5.7)                                            | 2154 (5.5)                                     |
| Cuticle cream                                                                      | 123 (3.0)                                            | 81 (3.9)                                             | 994 (2.5)                                      |
| Artificial nails or fill-ins                                                       | 46 (1.1)                                             | 30 (1.4)                                             | 125 (0.3)                                      |
| Perfume or cologne                                                                 | 182 (4.5)                                            | 108 (5.1)                                            | 1993 (5.1)                                     |
| Missing data on all beauty products included in latent class analysis <sup>a</sup> | 0 (0)                                                | 0 (0)                                                | 7 (0.02)                                       |
| <i>Hair products</i>                                                               |                                                      |                                                      |                                                |
| Shampoo                                                                            | 171 (4.2)                                            | 71 (3.4)                                             | 726 (1.9)                                      |
| Conditioner or rinse                                                               | 239 (5.9)                                            | 104 (4.9)                                            | 2057 (5.2)                                     |
| Hair spray                                                                         | 117 (2.9)                                            | 104 (4.9)                                            | 1619 (4.1)                                     |
| Hair styling gel or mousse                                                         | 85 (2.1)                                             | 70 (3.3)                                             | 1143 (2.9)                                     |
| Pomade or hair grease                                                              | 83 (2.1)                                             | 77 (3.7)                                             | 358 (0.9)                                      |
| Hair food                                                                          | 219 (5.4)                                            | 74 (3.5)                                             | 476 (1.2)                                      |
| Missing data on all hair products included in latent class analysis <sup>a</sup>   | 12 (0.3)                                             | 9 (0.4)                                              | 60 (0.2)                                       |
| <i>Skincare/hygiene products</i>                                                   |                                                      |                                                      |                                                |
| Body lotions or creams                                                             | 133 (3.3)                                            | 93 (4.4)                                             | 2168 (5.5)                                     |
| Hand lotions or creams                                                             | 181 (4.5)                                            | 106 (5.0)                                            | 2287 (5.8)                                     |
| Foot lotions or creams                                                             | 168 (4.2)                                            | 86 (4.1)                                             | 962 (2.5)                                      |
| Baby oil or mineral-based oils                                                     | 205 (5.1)                                            | 86 (4.1)                                             | 1615 (4.1)                                     |
| Petroleum jelly                                                                    | 141 (3.5)                                            | 92 (4.4)                                             | 1845 (4.7)                                     |
| Skin lighteners                                                                    | 44 (1.1)                                             | 19 (0.9)                                             | 131 (0.3)                                      |
| Self-tanning products                                                              | 32 (0.8)                                             | 22 (1.1)                                             | 291 (0.7)                                      |
| Bath or shower gel                                                                 | 103 (2.5)                                            | 84 (4.0)                                             | 730 (1.9)                                      |
| Shaving cream or gel                                                               | 116 (2.9)                                            | 76 (3.6)                                             | 1805 (4.6)                                     |
| Deodorant and/or antiperspirant                                                    | 131 (3.2)                                            | 121 (5.8)                                            | 2591 (6.6)                                     |
| Face cream or moisturizer                                                          | 63 (1.6)                                             | 36 (1.7)                                             | 875 (2.2)                                      |
| Cleansing cream                                                                    | 40 (1.0)                                             | 36 (1.7)                                             | 843 (2.1)                                      |
| Face masks                                                                         | 25 (0.6)                                             | 34 (1.6)                                             | 366 (0.9)                                      |
| Blemish or acne products                                                           | 66 (1.6)                                             | 41 (2.0)                                             | 960 (2.4)                                      |

|                               |           |           |            |
|-------------------------------|-----------|-----------|------------|
| Mouthwash or rinse            | 228 (5.6) | 150 (7.1) | 2326 (5.9) |
| Talcum powder under arms      | 235 (5.8) | 134 (6.4) | 2549 (6.5) |
| Talcum powder on genital area | 205 (5.1) | 67 (3.2)  | 1527 (3.9) |
| Talcum powder on other areas  | 222 (5.5) | 131 (6.2) | 2798 (7.1) |

Missing data on all skincare/hygiene products included in latent class analysis<sup>a</sup>

0 (0)

3 (0.1)

5 (0.01)

---

<sup>a</sup>These women were not included in the latent class analysis for this product group and excluded from all subsequent analyses with breast cancer

**Table S3. Participant characteristics among eligible Black or African American, non-Black Hispanic/Latina, and non-Hispanic White participants and those excluded from the analyses in the Sister Study**

|                                                         | Black participants<br>(n=4,600) |                   | Latina participants<br>(n=2,377) |                   | White participants<br>(n=42,558) |                   |
|---------------------------------------------------------|---------------------------------|-------------------|----------------------------------|-------------------|----------------------------------|-------------------|
|                                                         | Included<br>n (%)               | Excluded<br>n (%) | Included<br>n (%)                | Excluded<br>n (%) | Included<br>n (%)                | Excluded<br>n (%) |
| Number of participants (% of total)                     | 4,049 (88)                      | 551 (12)          | 2,104 (89)                       | 273 (11)          | 39,312 (92)                      | 3246 (8)          |
| Age at baseline, years (mean±SD)                        | 53.6 ± 8.3                      | 53.5 ± 8.4        | 53.2 ± 9.0                       | 52.9 ± 8.8        | 56.1 ± 8.9                       | 55.7 ± 9.4        |
| Birth cohort                                            |                                 |                   |                                  |                   |                                  |                   |
| 1928-1939                                               | 191 (5)                         | 36 (7)            | 120 (6)                          | 15 (5)            | 4,982 (13)                       | 591 (18)          |
| 1940-1949                                               | 1,065 (26)                      | 126 (23)          | 529 (25)                         | 73 (27)           | 13,333 (34)                      | 1,073 (33)        |
| 1950-1959                                               | 1,709 (42)                      | 240 (44)          | 820 (39)                         | 104 (38)          | 14,451 (37)                      | 1,101 (34)        |
| 1960-1974                                               | 1,084 (27)                      | 148 (27)          | 635 (30)                         | 81 (30)           | 6,546 (17)                       | 479 (15)          |
| Missing                                                 | 0                               | 1                 | 0                                | 0                 | 0                                | 2                 |
| Family income level growing up                          |                                 |                   |                                  |                   |                                  |                   |
| Well off                                                | 118 (3)                         | 14 (3)            | 108 (5)                          | 13 (5)            | 2,711 (7)                        | 204 (6)           |
| Middle income                                           | 1,683 (42)                      | 230 (44)          | 847 (40)                         | 114 (43)          | 24,789 (63)                      | 1,933 (61)        |
| Low income                                              | 1,488 (37)                      | 187 (36)          | 702 (33)                         | 73 (27)           | 9,553 (24)                       | 798 (25)          |
| Poor                                                    | 760 (19)                        | 93 (18)           | 447 (21)                         | 68 (25)           | 2,259 (6)                        | 228 (7)           |
| Missing                                                 | 0                               | 27                | 0                                | 5                 | 0                                | 83                |
| Highest level of education in household at age 13 years |                                 |                   |                                  |                   |                                  |                   |
| Less than high school degree                            | 1,513 (37)                      | 127 (31)          | 1,196 (57)                       | 107 (49)          | 5,549 (14)                       | 498 (17)          |
| High school degree or equivalent                        | 1,437 (35)                      | 160 (39)          | 394 (19)                         | 53 (24)           | 14,460 (37)                      | 1,041 (36)        |
| Some college or technical degree                        | 637 (16)                        | 88 (21)           | 215 (10)                         | 28 (13)           | 7,714 (20)                       | 591 (21)          |
| 4-year college degree or higher                         | 462 (11)                        | 36 (9)            | 299 (14)                         | 30 (14)           | 11,589 (29)                      | 748 (26)          |
| Missing                                                 | 0                               | 140               | 0                                | 55                | 0                                | 368               |
| Age at thelarche                                        |                                 |                   |                                  |                   |                                  |                   |
| <10 years                                               | 266 (7)                         | 43 (8)            | 123 (6)                          | 16 (6)            | 1,193 (3)                        | 85 (3)            |
| 10-13 years                                             | 2,910 (73)                      | 378 (71)          | 1,601 (77)                       | 201 (75)          | 31,108 (80)                      | 2,553 (80)        |
| >13 years                                               | 810 (20)                        | 113 (21)          | 346 (17)                         | 51 (19)           | 6,572 (17)                       | 564 (18)          |
| Missing                                                 | 63                              | 17                | 34                               | 5                 | 439                              | 44                |
| Weight relative to peers at age 10                      |                                 |                   |                                  |                   |                                  |                   |
| Lighter                                                 | 1,696 (42)                      | 219 (40)          | 869 (42)                         | 112 (42)          | 13,189 (34)                      | 1,170 (36)        |
| Same weight                                             | 1,705 (42)                      | 245 (45)          | 978 (47)                         | 127 (48)          | 18,597 (47)                      | 1,491 (46)        |
| Heavier                                                 | 626 (16)                        | 80 (15)           | 245 (12)                         | 28 (11)           | 7,430 (19)                       | 572 (18)          |
| Missing                                                 | 22                              | 7                 | 12                               | 6                 | 96                               | 13                |

*Note: Column percentages are displayed, except where noted in first row. Missing data are not included in calculation of percentages. Participants with missing data on family income level growing up and highest level of education in household at age 13 years were excluded (see Figure S1).*

**Table S4. Associations between latent classes of self-reported personal care product use during the ages of 10 to 13 years and incident breast cancer among Black or African American, non-Black Hispanic/Latina, and non-Hispanic White women in the Sister Study with additional adjustment for age at thelarche and weight relative to peers at age 10 years**

|                                                                                                             | Person-years | N cases | Age-adjusted HR (95% CI) | Multivariable-adjusted HR (95% CI) <sup>a</sup> | Additionally adjusted for age at thelarche and relative weight at age 10 years HR (95% CI) <sup>b</sup> |
|-------------------------------------------------------------------------------------------------------------|--------------|---------|--------------------------|-------------------------------------------------|---------------------------------------------------------------------------------------------------------|
| <i>Black or African American women (n=3,966)<sup>c</sup></i>                                                |              |         |                          |                                                 |                                                                                                         |
| Latent classes of beauty product use from 10-13 years                                                       |              |         |                          |                                                 |                                                                                                         |
| Any makeup, nail product & perfume use                                                                      | 3,610        | 24      | 1.03 (0.66, 1.60)        | 1.06 (0.68, 1.65)                               | 1.07 (0.68, 1.68)                                                                                       |
| Frequent nail product & perfume use                                                                         | 2,521        | 22      | 1.33 (0.84, 2.13)        | 1.34 (0.84, 2.15)                               | 1.33 (0.83, 2.13)                                                                                       |
| Some nail product & perfume use                                                                             | 19,655       | 125     | 0.92 (0.70, 1.19)        | 0.92 (0.71, 1.19)                               | 0.92 (0.70, 1.19)                                                                                       |
| Some use of perfume & lip moisturizer                                                                       | 13,637       | 101     | 1 (Referent)             | 1 (Referent)                                    | 1 (Referent)                                                                                            |
| Latent classes of hair product use from 10-13 years                                                         |              |         |                          |                                                 |                                                                                                         |
| Frequent shampoo, conditioner & pomade, some hair spray, hair gel & hair food                               | 7,224        | 51      | 1.26 (0.90, 1.77)        | 1.29 (0.92, 1.83)                               | 1.29 (0.91, 1.83)                                                                                       |
| Frequent shampoo, conditioner & pomade                                                                      | 14,926       | 104     | 1.24 (0.94, 1.63)        | 1.26 (0.95, 1.67)                               | 1.25 (0.94, 1.65)                                                                                       |
| Frequent pomade & some shampoo                                                                              | 17,140       | 117     | 1 (Referent)             | 1 (Referent)                                    | 1 (Referent)                                                                                            |
| Latent classes of skincare/hygiene product use from 10-13 years <sup>d</sup>                                |              |         |                          |                                                 |                                                                                                         |
| Frequent moisturizers, including lotions, oil & petroleum jelly, some cleanser, hygiene products & talc use | 10,613       | 69      | 1.05 (0.72, 1.51)        | 1.08 (0.74, 1.56)                               | 1.07 (0.74, 1.56)                                                                                       |
| Frequent lotions, some use of other moisturizers & little talc use                                          | 10,370       | 75      | 1.18 (0.83, 1.69)        | 1.21 (0.84, 1.74)                               | 1.21 (0.84, 1.74)                                                                                       |
| Some moisturizers, including lotions, oil & petroleum jelly, & talc use                                     | 11,245       | 78      | 1.00 (0.71, 1.43)        | 1.01 (0.71, 1.44)                               | 1.01 (0.70, 1.44)                                                                                       |
| Some use of lotions & petroleum jelly                                                                       | 7,196        | 50      | 1 (Referent)             | 1 (Referent)                                    | 1 (Referent)                                                                                            |
| <i>Non-Black Hispanic/Latina women (n=2,059)<sup>e</sup></i>                                                |              |         |                          |                                                 |                                                                                                         |
| Latent classes of beauty product use from 10-13 years                                                       |              |         |                          |                                                 |                                                                                                         |
| Frequent nail product & perfume, any makeup use                                                             | 1,201        | 8       | 1.18 (0.56, 2.51)        | 1.20 (0.56, 2.58)                               | 1.17 (0.54, 2.53)                                                                                       |
| Some nail product & perfume, any makeup use                                                                 | 3,259        | 16      | 0.85 (0.48, 1.50)        | 0.87 (0.49, 1.53)                               | 0.87 (0.49, 1.54)                                                                                       |
| Some nail product & perfume, little makeup use                                                              | 7,082        | 51      | 1.24 (0.84, 1.82)        | 1.26 (0.85, 1.87)                               | 1.27 (0.84, 1.90)                                                                                       |
| Some use of perfume & lip moisturizer                                                                       | 8,824        | 51      | 1 (Referent)             | 1 (Referent)                                    | 1 (Referent)                                                                                            |
| Latent classes of hair product use from 10-13 years                                                         |              |         |                          |                                                 |                                                                                                         |
| Frequent shampoo & conditioner, some hair spray, hair food, hair gel & pomade                               | 7,362        | 44      | 1.35 (0.78, 2.35)        | 1.37 (0.78, 2.41)                               | 1.36 (0.77, 2.41)                                                                                       |

|                                                                                                             |         |       |                   |                   |                   |
|-------------------------------------------------------------------------------------------------------------|---------|-------|-------------------|-------------------|-------------------|
| Frequent shampoo & conditioner                                                                              | 8,799   | 63    | 1.58 (0.94, 2.68) | 1.58 (0.93, 2.69) | 1.60 (0.94, 2.71) |
| Some shampoo                                                                                                | 4,134   | 19    | 1 (Referent)      | 1 (Referent)      | 1 (Referent)      |
| Latent classes of skincare/hygiene product use from 10-13 years                                             |         |       |                   |                   |                   |
| Frequent lotions & some oil, petroleum jelly, cleanser, hygiene products & talc use                         | 3,991   | 20    | 0.74 (0.43, 1.27) | 0.73 (0.41, 1.29) | 0.73 (0.41, 1.29) |
| Frequent lotions, some use of other moisturizers & little talc use                                          | 6,240   | 48    | 1.12 (0.74, 1.70) | 1.12 (0.74, 1.71) | 1.12 (0.74, 1.71) |
| Some moisturizers, including lotions, oil & petroleum jelly, & talc use                                     | 3,935   | 15    | 0.54 (0.30, 0.98) | 0.54 (0.30, 0.98) | 0.54 (0.30, 0.98) |
| Little use of any products                                                                                  | 6,175   | 43    | 1 (Referent)      | 1 (Referent)      | 1 (Referent)      |
| <i>Non-Hispanic White women (n=38,789)<sup>f</sup></i>                                                      |         |       |                   |                   |                   |
| Latent classes of beauty product use from 10-13 years                                                       |         |       |                   |                   |                   |
| Any makeup, nail product & perfume use                                                                      | 89,861  | 599   | 1.01 (0.91, 1.12) | 1.01 (0.91, 1.12) | 1.00 (0.90, 1.11) |
| Nail product & perfume, little makeup use                                                                   | 178,506 | 1,312 | 1.01 (0.93, 1.09) | 1.00 (0.93, 1.09) | 1.00 (0.92, 1.08) |
| Some use of perfume & lip moisturizer                                                                       | 157,799 | 1,181 | 1 (Referent)      | 1 (Referent)      | 1 (Referent)      |
| Latent classes of hair product use from 10-13 years <sup>d</sup>                                            |         |       |                   |                   |                   |
| Frequent shampoo, conditioner & hair spray & some hair gel                                                  | 25,236  | 174   | 1.04 (0.88, 1.22) | 1.04 (0.88, 1.22) | 1.04 (0.88, 1.22) |
| Frequent shampoo & conditioner, some hair spray use                                                         | 112,962 | 810   | 1.05 (0.96, 1.43) | 1.04 (0.95, 1.14) | 1.04 (0.95, 1.14) |
| Frequent shampoo & conditioner use                                                                          | 68,260  | 441   | 1.00 (0.89, 1.12) | 1.00 (0.89, 1.12) | 1.00 (0.90, 1.12) |
| Frequent shampoo & some conditioner                                                                         | 219,177 | 1,664 | 1 (Referent)      | 1 (Referent)      | 1 (Referent)      |
| Latent classes of skincare/hygiene product use from 10-13 years                                             |         |       |                   |                   |                   |
| Frequent moisturizers, including lotions & oil, some petroleum jelly, cleanser, hygiene products & talc use | 66,526  | 443   | 0.96 (0.85, 1.07) | 0.95 (0.85, 1.07) | 0.95 (0.85, 1.07) |
| Some moisturizers, including lotions & oil, & talc use                                                      | 80,731  | 576   | 0.94 (0.85, 1.04) | 0.94 (0.85, 1.04) | 0.94 (0.85, 1.04) |
| Some moisturizers, including lotions & oil, little talc use                                                 | 145,050 | 1,036 | 0.98 (0.90, 1.07) | 0.98 (0.90, 1.07) | 0.98 (0.89, 1.07) |
| Little use of any products                                                                                  | 133,884 | 1,037 | 1 (Referent)      | 1 (Referent)      | 1 (Referent)      |

CI: Confidence Interval; HR: Hazard Ratio

<sup>a</sup>Adjusted for birth cohort in ~10-year intervals, family income level growing up (well-off, middle income, low income, poor), and maximum household education level at age 13 (less than high school, high school graduate or equivalent, some college or technical school, 4-year degree or higher) in addition to age as the time scale

<sup>b</sup>Adjusted for all covariates in <sup>a</sup> plus age at thelarche (<10 years, 10-13 years, >13 years) and weight relative to peers at age 10 years (lighter, same heavier)

<sup>c</sup>83 Black women missing data on age at thelarche or weight relative to peers at age 10 years are excluded from these analyses.

<sup>d</sup>Proportional hazards assumption violated for exposure in multivariable models (p<0.05)

<sup>e</sup>45 Latina women missing data on age at thelarche or weight relative to peers at age 10 years are excluded from these analyses.

<sup>f</sup>523 White women missing data on age at thelarche or weight relative to peers at age 10 years are excluded from these analyses.

**Table S5. Associations between race- and ethnicity-specific latent classes of self-reported personal care product use during the ages of 10 to 13 years and incident breast cancer by menopausal status in the Sister Study**

|                                                                                                             | Pre-menopausal  |                                                 | Post-menopausal |                                                 | P-het <sup>b</sup> |
|-------------------------------------------------------------------------------------------------------------|-----------------|-------------------------------------------------|-----------------|-------------------------------------------------|--------------------|
|                                                                                                             | N cases         | Multivariable-adjusted HR (95% CI) <sup>a</sup> | N cases         | Multivariable-adjusted HR (95% CI) <sup>a</sup> |                    |
| <i>Black or African American women (n=4,046)<sup>c</sup></i>                                                |                 |                                                 |                 |                                                 |                    |
| Latent classes of beauty product use from 10-13 years                                                       |                 |                                                 |                 |                                                 | 0.40               |
| Any makeup, nail product & perfume use                                                                      | 8               | 1.07 (0.45, 2.54)                               | 16              | 0.95 (0.56, 1.62)                               |                    |
| Frequent nail product & perfume use                                                                         | 5               | 0.78 (0.29, 2.11)                               | 18              | 1.51 (0.91, 2.52)                               |                    |
| Some nail product & perfume use                                                                             | 21              | 0.61 (0.31, 1.18)                               | 106             | 0.95 (0.72, 1.25)                               |                    |
| Some use of perfume & lip moisturizer                                                                       | 17              | 1 (Referent)                                    | 89              | 1 (Referent)                                    |                    |
| Latent classes of hair product use from 10-13 years                                                         |                 |                                                 |                 |                                                 | 0.90               |
| Frequent shampoo, conditioner & pomade, some hair spray, hair gel & hair food                               | 14              | 1.07 (0.49, 2.31)                               | 38              | 1.33 (0.91, 1.95)                               |                    |
| Frequent shampoo, conditioner & pomade                                                                      | 25              | 1.11 (0.55, 2.26)                               | 81              | 1.25 (0.93, 1.69)                               |                    |
| Frequent pomade & some shampoo                                                                              | 12              | 1 (Referent)                                    | 110             | 1 (Referent)                                    |                    |
| Latent classes of skincare/hygiene product use from 10-13 years                                             |                 |                                                 |                 |                                                 | 0.08               |
| Frequent moisturizers, including lotions, oil & petroleum jelly, some cleanser, hygiene products & talc use | 7               | 0.41 (0.15, 1.16)                               | 62              | 1.22 (0.82, 1.81)                               |                    |
| Frequent lotions, some use of other moisturizers & little talc use                                          | 24              | 1.24 (0.55, 2.82)                               | 54              | 1.14 (0.77, 1.70)                               |                    |
| Some moisturizers, including lotions, oil & petroleum jelly, & talc use                                     | 12              | 1.07 (0.44, 2.62)                               | 69              | 1.00 (0.68, 1.45)                               |                    |
| Some use of lotions & petroleum jelly                                                                       | 8               | 1 (Referent)                                    | 44              | 1 (Referent)                                    |                    |
| <i>Non-Black Hispanic/Latina women (n=2,104)</i>                                                            |                 |                                                 |                 |                                                 |                    |
| Latent classes of beauty product use from 10-13 years                                                       |                 |                                                 |                 |                                                 | NE <sup>d</sup>    |
| Frequent nail product & perfume, any makeup use                                                             | <5 <sup>d</sup> | NE <sup>d</sup>                                 | 5               | 1.11 (0.43, 2.90)                               |                    |
| Some nail product & perfume, any makeup use                                                                 | <5 <sup>d</sup> | NE <sup>d</sup>                                 | 14              | 1.17 (0.64, 2.14)                               |                    |
| Some nail product & perfume, little makeup use                                                              | 14              | NE <sup>d</sup>                                 | 38              | 1.19 (0.76, 1.87)                               |                    |
| Some use of perfume & lip moisturizer                                                                       | 11              | NE <sup>d</sup>                                 | 41              | 1 (Referent)                                    |                    |
| Latent classes of hair product use from 10-13 years                                                         |                 |                                                 |                 |                                                 | NE <sup>d</sup>    |
| Frequent shampoo & conditioner, some hair spray, hair food, hair gel & pomade                               | 13              | NE <sup>d</sup>                                 | 32              | 1.54 (0.82, 2.89)                               |                    |
| Frequent shampoo & conditioner                                                                              | 14              | NE <sup>d</sup>                                 | 50              | 1.76 (0.99, 3.14)                               |                    |
| Some shampoo                                                                                                | <5 <sup>d</sup> | NE <sup>d</sup>                                 | 16              | 1 (Referent)                                    |                    |
| Latent classes of skincare/hygiene product use from 10-13 years                                             |                 |                                                 |                 |                                                 | NE <sup>d</sup>    |
| Frequent lotions & some oil, petroleum jelly, cleanser, hygiene products & talc use                         | 7               | NE <sup>d</sup>                                 | 13              | 0.71 (0.36, 1.39)                               |                    |
| Frequent lotions, some use of other moisturizers & little talc use                                          | 13              | NE <sup>d</sup>                                 | 35              | 1.11 (0.69, 1.79)                               |                    |
| Some moisturizers, including lotions, oil & petroleum jelly, & talc use                                     | <5 <sup>d</sup> | NE <sup>d</sup>                                 | 13              | 0.55 (0.29, 1.05)                               |                    |
| Little use of any products                                                                                  | 7               | NE <sup>d</sup>                                 | 37              | 1 (Referent)                                    |                    |
| <i>Non-Hispanic White women (n=39,310)<sup>e</sup></i>                                                      |                 |                                                 |                 |                                                 |                    |
| Latent classes of beauty product use from 10-13 years                                                       |                 |                                                 |                 |                                                 | 0.74               |
| Any makeup, nail product & perfume use                                                                      | 174             | 1.05 (0.84, 1.32)                               | 429             | 0.99 (0.88, 1.12)                               |                    |

|                                                                                                             |     |                   |       |                   |      |
|-------------------------------------------------------------------------------------------------------------|-----|-------------------|-------|-------------------|------|
| Nail product & perfume, little makeup use                                                                   | 181 | 0.97 (0.77, 1.21) | 1,144 | 1.00 (0.92, 1.09) |      |
| Some use of perfume & lip moisturizer                                                                       | 134 | 1 (Referent)      | 1,075 | 1 (Referent)      |      |
| Latent classes of hair product use from 10-13 years <sup>f</sup>                                            |     |                   |       |                   | 0.58 |
| Frequent shampoo, conditioner & hair spray & some hair gel                                                  | 40  | 1.14 (0.78, 1.65) | 139   | 1.06 (0.89, 1.26) |      |
| Frequent shampoo & conditioner, some hair spray use                                                         | 155 | 1.18 (0.93, 1.49) | 659   | 1.02 (0.93, 1.12) |      |
| Frequent shampoo & conditioner use                                                                          | 150 | 1.14 (0.90, 1.45) | 293   | 0.96 (0.84, 1.10) |      |
| Frequent shampoo & some conditioner                                                                         | 142 | 1 (Referent)      | 1,555 | 1 (Referent)      |      |
| Latent classes of skincare/hygiene product use from 10-13 years                                             |     |                   |       |                   | 0.34 |
| Frequent moisturizers, including lotions & oil, some petroleum jelly, cleanser, hygiene products & talc use | 127 | 1.09 (0.84, 1.42) | 319   | 0.91 (0.80, 1.04) |      |
| Some moisturizers, including lotions & oil, & talc use                                                      | 59  | 0.84 (0.61, 1.16) | 522   | 0.95 (0.85, 1.05) |      |
| Some moisturizers, including lotions & oil, little talc use                                                 | 196 | 0.97 (0.77, 1.24) | 854   | 0.98 (0.90, 1.08) |      |
| Little use of any products                                                                                  | 107 | 1 (Referent)      | 953   | 1 (Referent)      |      |

CI: Confidence Interval; HR: Hazard Ratio; NE: Not Estimated; p-het: P-value for test of heterogeneity

<sup>a</sup>Adjusted for birth cohort in ~10-year intervals, family income level growing up (well-off, middle income, low income, poor), and maximum household education level at age 13 (less than high school, high school graduate or equivalent, some college or technical school, 4-year degree or higher) in addition to age as the time scale

<sup>b</sup>P-het from a Wald or joint Wald test of exposure\*modifier interaction term(s)

<sup>c</sup>3 Black women who reported never having a menstrual period were excluded from this analysis

<sup>d</sup>We did not estimate associations with pre-menopausal cancer or test for heterogeneity by menopausal status if there were less than 5 exposed cases in at least one latent class. To protect participant confidentiality, we do not report exact case numbers if less than 5.

<sup>e</sup>2 White women who reported never having a menstrual period were excluded from this analysis

<sup>f</sup>Proportional hazards assumption violated for exposure in multivariable model of pre-menopausal cancer (p<0.05)



**Table S6. Associations between race- and ethnicity-specific latent classes of self-reported personal care product use during the ages of 10 to 13 years and incident breast cancer by estrogen receptor (ER) status in the Sister Study**

|                                                                                                             | ER+     |                                                 | ER-             |                                                 | Relative HR for ER- vs. ER+<br>HR (95% CI) | P-het <sup>b</sup> |
|-------------------------------------------------------------------------------------------------------------|---------|-------------------------------------------------|-----------------|-------------------------------------------------|--------------------------------------------|--------------------|
|                                                                                                             | N cases | Multivariable-adjusted HR (95% CI) <sup>a</sup> | N cases         | Multivariable-adjusted HR (95% CI) <sup>a</sup> |                                            |                    |
| <i>Black or African American women (n=4,049)</i>                                                            |         |                                                 |                 |                                                 |                                            |                    |
| Latent classes of beauty product use from 10-13 years                                                       |         |                                                 |                 |                                                 |                                            | NE <sup>c</sup>    |
| Any makeup, nail product & perfume use                                                                      | 10      | 0.85 (0.44, 1.66)                               | <5 <sup>c</sup> | NE <sup>c</sup>                                 | NE <sup>c</sup>                            |                    |
| Frequent nail product & perfume use                                                                         | 13      | 1.49 (0.80, 2.75)                               | 6               | NE <sup>c</sup>                                 | NE <sup>c</sup>                            |                    |
| Some nail product & perfume use                                                                             | 81      | 1.09 (0.77, 1.53)                               | 18              | NE <sup>c</sup>                                 | NE <sup>c</sup>                            |                    |
| Some use of perfume & lip moisturizer                                                                       | 57      | 1 (Referent)                                    | 17              | NE <sup>c</sup>                                 | NE <sup>c</sup>                            |                    |
| Latent classes of hair product use from 10-13 years <sup>d</sup>                                            |         |                                                 |                 |                                                 |                                            | 0.80               |
| Frequent shampoo, conditioner & pomade, some hair spray, hair gel & hair food                               | 28      | 1.22 (0.78, 1.91)                               | 9               | 1.49 (0.63, 3.48)                               | 1.22 (0.47, 3.18)                          |                    |
| Frequent shampoo, conditioner & pomade                                                                      | 59      | 1.22 (0.84, 1.77)                               | 20              | 1.58 (0.82, 3.03)                               | 1.29 (0.61, 2.73)                          |                    |
| Frequent pomade & some shampoo                                                                              | 74      | 1 (Referent)                                    | 16              | 1 (Referent)                                    | 1 (Referent)                               |                    |
| Latent classes of skincare/hygiene product use from 10-13 years                                             |         |                                                 |                 |                                                 |                                            | 0.62               |
| Frequent moisturizers, including lotions, oil & petroleum jelly, some cleanser, hygiene products & talc use | 44      | 1.17 (0.73, 1.87)                               | 9               | 0.87 (0.32, 2.39)                               | 0.75 (0.25, 2.26)                          |                    |
| Frequent lotions, some use of other moisturizers & little talc use                                          | 40      | 1.10 (0.69, 1.77)                               | 14              | 1.39 (0.55, 3.52)                               | 1.26 (0.45, 3.57)                          |                    |
| Some moisturizers, including lotions, oil & petroleum jelly, & talc use                                     | 46      | 0.96 (0.61, 1.52)                               | 15              | 1.31 (0.54, 3.16)                               | 1.36 (0.50, 3.68)                          |                    |
| Some use of lotions & petroleum jelly                                                                       | 31      | 1 (Referent)                                    | 7               | 1 (Referent)                                    | 1 (Referent)                               |                    |
| <i>Non-Black Hispanic/Latina women (n=2,104)</i>                                                            |         |                                                 |                 |                                                 |                                            |                    |
| Latent classes of beauty product use from 10-13 years <sup>d</sup>                                          |         |                                                 |                 |                                                 |                                            | NE <sup>c</sup>    |
| Frequent nail product & perfume, any makeup use                                                             | 6       | 1.30 (0.54, 3.10)                               | <5 <sup>c</sup> | NE <sup>c</sup>                                 | NE <sup>c</sup>                            |                    |
| Some nail product & perfume, any makeup use                                                                 | 14      | 1.13 (0.61, 2.09)                               | <5 <sup>c</sup> | NE <sup>c</sup>                                 | NE <sup>c</sup>                            |                    |
| Some nail product & perfume, little makeup use                                                              | 35      | 1.27 (0.79, 2.04)                               | 5               | NE <sup>c</sup>                                 | NE <sup>c</sup>                            |                    |
| Some use of perfume & lip moisturizer                                                                       | 35      | 1 (Referent)                                    | 5               | NE <sup>c</sup>                                 | NE <sup>c</sup>                            |                    |
| Latent classes of hair product use from 10-13 years                                                         |         |                                                 |                 |                                                 |                                            | NE <sup>c</sup>    |
| Frequent shampoo & conditioner, some hair spray, hair food, hair gel & pomade                               | 31      | 1.12 (0.61, 2.07)                               | <5 <sup>c</sup> | NE <sup>c</sup>                                 | NE <sup>c</sup>                            |                    |
| Frequent shampoo & conditioner                                                                              | 43      | 1.28 (0.71, 2.29)                               | 7               | NE <sup>c</sup>                                 | NE <sup>c</sup>                            |                    |
| Some shampoo                                                                                                | 16      | 1 (Referent)                                    | <5 <sup>c</sup> | NE <sup>c</sup>                                 | NE <sup>c</sup>                            |                    |

|                                                                                                             |       |                   |                 |                   |                   |  |                 |
|-------------------------------------------------------------------------------------------------------------|-------|-------------------|-----------------|-------------------|-------------------|--|-----------------|
| Latent classes of skincare/hygiene product use from 10-13 years                                             |       |                   |                 |                   |                   |  | NE <sup>c</sup> |
| Frequent lotions & some oil, petroleum jelly, cleanser, hygiene products & talc use                         | 15    | 0.75 (0.39, 1.44) | <5 <sup>c</sup> | NE <sup>c</sup>   |                   |  | NE <sup>c</sup> |
| Frequent lotions, some use of other moisturizers & little talc use                                          | 32    | 1.01 (0.62, 1.65) | 7               | NE <sup>c</sup>   |                   |  | NE <sup>c</sup> |
| Some moisturizers, including lotions, oil & petroleum jelly, & talc use                                     | 12    | 0.61 (0.31, 1.20) | <5 <sup>c</sup> | NE <sup>c</sup>   |                   |  | NE <sup>c</sup> |
| Little use of any products                                                                                  | 31    | 1 (Referent)      | <5 <sup>c</sup> | NE <sup>c</sup>   |                   |  | NE <sup>c</sup> |
| <i>Non-Hispanic White women (n=39,312)</i>                                                                  |       |                   |                 |                   |                   |  |                 |
| Latent classes of beauty product use from 10-13 years                                                       |       |                   |                 |                   |                   |  | 0.86            |
| Any makeup, nail product & perfume use                                                                      | 452   | 1.01 (0.90, 1.14) | 77              | 0.95 (0.71, 1.27) | 0.94 (0.69, 1.28) |  |                 |
| Nail product & perfume, little makeup use                                                                   | 1,007 | 1.01 (0.93, 1.11) | 169             | 1.03 (0.83, 1.29) | 1.02 (0.80, 1.29) |  |                 |
| Some use of perfume & lip moisturizer                                                                       | 903   | 1 (Referent)      | 146             | 1 (Referent)      | 1 (Referent)      |  |                 |
| Latent classes of hair product use from 10-13 years                                                         |       |                   |                 |                   |                   |  | 0.62            |
| Frequent shampoo, conditioner & hair spray & some hair gel                                                  | 131   | 1.02 (0.85, 1.23) | 25              | 1.17 (0.76, 1.80) | 1.14 (0.72, 1.83) |  |                 |
| Frequent shampoo & conditioner, some hair spray use                                                         | 617   | 1.05 (0.95, 1.16) | 99              | 0.97 (0.76, 1.25) | 0.93 (0.71, 1.22) |  |                 |
| Frequent shampoo & conditioner use                                                                          | 332   | 0.99 (0.87, 1.13) | 68              | 1.14 (0.85, 1.53) | 1.15 (0.83, 1.59) |  |                 |
| Frequent shampoo & some conditioner                                                                         | 1,278 | 1 (Referent)      | 200             | 1 (Referent)      | 1 (Referent)      |  |                 |
| Latent classes of skincare/hygiene product use from 10-13 years                                             |       |                   |                 |                   |                   |  | 0.50            |
| Frequent moisturizers, including lotions & oil, some petroleum jelly, cleanser, hygiene products & talc use | 343   | 1.00 (0.88, 1.14) | 55              | 0.85 (0.62, 1.17) | 0.85 (0.60, 1.20) |  |                 |
| Some moisturizers, including lotions & oil, & talc use                                                      | 449   | 0.98 (0.87, 1.10) | 64              | 0.78 (0.58, 1.05) | 0.80 (0.58, 1.09) |  |                 |
| Some moisturizers, including lotions & oil, little talc use                                                 | 791   | 1.00 (0.91, 1.11) | 137             | 0.95 (0.75, 1.21) | 0.95 (0.73, 1.23) |  |                 |
| Little use of any products                                                                                  | 779   | 1 (Referent)      | 136             | 1 (Referent)      | 1 (Referent)      |  |                 |

CI: Confidence Interval; ER: Estrogen Receptor; HR: Hazard Ratio; NE: Not Estimated; p-het: P-value for test of heterogeneity

<sup>a</sup>Adjusted for birth cohort in ~10-year intervals, family income level growing up (well-off, middle income, low income, poor), and maximum household education level at age 13 (less than high school, high school graduate or equivalent, some college or technical school, 4-year degree or higher) in addition to age as the time scale

<sup>b</sup>P-het from a Wald or joint Wald test of exposure\*modifier interaction term(s)

<sup>c</sup>We did not estimate associations with ER- or test for heterogeneity by ER status if there were less than 5 exposed cases in at least one latent class. To protect participant confidentiality, we do not report exact case numbers if less than 5.

<sup>d</sup>Proportional hazards assumption violated for exposure in multivariable model of ER+ cancer (p<0.05)

**Table S7. Associations between race- and ethnicity-specific latent classes of self-reported personal care product use during the ages of 10 to 13 years and incident breast cancer by tumor invasiveness in the Sister Study**

|                                                                                                             | Invasive |                                                 | DCIS            |                                                 | Relative HR for Invasive vs DCIS<br>HR (95% CI) | P-het <sup>b</sup> |
|-------------------------------------------------------------------------------------------------------------|----------|-------------------------------------------------|-----------------|-------------------------------------------------|-------------------------------------------------|--------------------|
|                                                                                                             | N cases  | Multivariable-adjusted HR (95% CI) <sup>a</sup> | N cases         | Multivariable-adjusted HR (95% CI) <sup>a</sup> |                                                 |                    |
| <i>Black or African American women (n=4,049)</i>                                                            |          |                                                 |                 |                                                 |                                                 |                    |
| Latent classes of beauty product use from 10-13 years                                                       |          |                                                 |                 |                                                 |                                                 | 0.52               |
| Any makeup, nail product & perfume use                                                                      | 19       | 1.18 (0.71, 1.96)                               | 5               | 0.70 (0.27, 1.78)                               | 1.69 (0.58, 4.94)                               |                    |
| Frequent nail product & perfume use                                                                         | 18       | 1.53 (0.90, 2.59)                               | 5               | 0.92 (0.35, 2.38)                               | 1.66 (0.56, 4.93)                               |                    |
| Some nail product & perfume use                                                                             | 97       | 0.98 (0.72, 1.33)                               | 30              | 0.68 (0.41, 1.12)                               | 1.44 (0.80, 2.59)                               |                    |
| Some use of perfume & lip moisturizer                                                                       | 73       | 1 (Referent)                                    | 33              | 1 (Referent)                                    | 1 (Referent)                                    |                    |
| Latent classes of hair product use from 10-13 years                                                         |          |                                                 |                 |                                                 |                                                 | 0.12               |
| Frequent shampoo, conditioner & pomade, some hair spray, hair gel & hair food                               | 44       | 1.52 (1.04, 2.23)                               | 8               | 0.68 (0.32, 1.46)                               | 2.24 (0.95, 5.28)                               |                    |
| Frequent shampoo, conditioner & pomade                                                                      | 75       | 1.22 (0.88, 1.68)                               | 31              | 1.29 (0.76, 2.19)                               | 0.95 (0.51, 1.76)                               |                    |
| Frequent pomade & some shampoo                                                                              | 88       | 1 (Referent)                                    | 34              | 1 (Referent)                                    | 1 (Referent)                                    |                    |
| Latent classes of skincare/hygiene product use from 10-13 years                                             |          |                                                 |                 |                                                 |                                                 | 0.99               |
| Frequent moisturizers, including lotions, oil & petroleum jelly, some cleanser, hygiene products & talc use | 50       | 1.02 (0.66, 1.58)                               | 19              | 1.13 (0.55, 2.34)                               | 0.90 (0.39, 2.09)                               |                    |
| Frequent lotions, some use of other moisturizers & little talc use                                          | 59       | 1.22 (0.81, 1.83)                               | 19              | 1.20 (0.58, 2.48)                               | 1.02 (0.44, 2.34)                               |                    |
| Some moisturizers, including lotions, oil & petroleum jelly, & talc use                                     | 59       | 0.99 (0.66, 1.49)                               | 22              | 1.08 (0.54, 2.16)                               | 0.92 (0.41, 2.04)                               |                    |
| Some use of lotions & petroleum jelly                                                                       | 39       | 1 (Referent)                                    | 13              | 1 (Referent)                                    | 1 (Referent)                                    |                    |
| <i>Non-Black Hispanic/Latina women (n=2,104)</i>                                                            |          |                                                 |                 |                                                 |                                                 |                    |
| Latent classes of beauty product use from 10-13 years <sup>c</sup>                                          |          |                                                 |                 |                                                 |                                                 | NE <sup>d</sup>    |
| Frequent nail product & perfume, any makeup use                                                             | 8        | 1.56 (0.72, 3.35)                               | <5 <sup>d</sup> | NE <sup>d</sup>                                 | NE <sup>d</sup>                                 |                    |
| Some nail product & perfume, any makeup use                                                                 | 15       | 1.03 (0.57, 1.86)                               | <5 <sup>d</sup> | NE <sup>d</sup>                                 | NE <sup>d</sup>                                 |                    |
| Some nail product & perfume, little makeup use                                                              | 40       | 1.20 (0.77, 1.87)                               | 12              | NE <sup>d</sup>                                 | NE <sup>d</sup>                                 |                    |
| Some use of perfume & lip moisturizer                                                                       | 43       | 1 (Referent)                                    | 8               | NE <sup>d</sup>                                 | NE <sup>d</sup>                                 |                    |
| Latent classes of hair product use from 10-13 years                                                         |          |                                                 |                 |                                                 |                                                 | NE <sup>d</sup>    |
| Frequent shampoo & conditioner, some hair spray, hair food, hair gel & pomade                               | 36       | 1.35 (0.74, 2.45)                               | 9               | NE <sup>d</sup>                                 | NE <sup>d</sup>                                 |                    |
| Frequent shampoo & conditioner                                                                              | 53       | 1.58 (0.90, 2.76)                               | 10              | NE <sup>d</sup>                                 | NE <sup>d</sup>                                 |                    |

|                                                                                                             |       |                   |                 |                   |                   |                 |
|-------------------------------------------------------------------------------------------------------------|-------|-------------------|-----------------|-------------------|-------------------|-----------------|
| Some shampoo                                                                                                | 17    | 1 (Referent)      | <5 <sup>d</sup> | NE <sup>d</sup>   | NE <sup>d</sup>   |                 |
| Latent classes of skincare/hygiene product use from 10-13 years                                             |       |                   |                 |                   |                   | NE <sup>d</sup> |
| Frequent lotions & some oil, petroleum jelly, cleanser, hygiene products & talc use                         | 17    | 0.80 (0.43, 1.47) | <5 <sup>d</sup> | NE <sup>d</sup>   | NE <sup>d</sup>   |                 |
| Frequent lotions, some use of other moisturizers & little talc use                                          | 40    | 1.16 (0.73, 1.84) | 8               | NE <sup>d</sup>   | NE <sup>d</sup>   |                 |
| Some moisturizers, including lotions, oil & petroleum jelly, & talc use                                     | 13    | 0.57 (0.30, 1.09) | <5 <sup>d</sup> | NE <sup>d</sup>   | NE <sup>d</sup>   |                 |
| Little use of any products                                                                                  | 36    | 1 (Referent)      | 7               | NE <sup>d</sup>   | NE <sup>d</sup>   |                 |
| <i>Non-Hispanic White women (n=39,312)</i>                                                                  |       |                   |                 |                   |                   | 0.98            |
| Latent classes of beauty product use from 10-13 years <sup>c</sup>                                          |       |                   |                 |                   |                   |                 |
| Any makeup, nail product & perfume use                                                                      | 467   | 1.02 (0.90, 1.14) | 134             | 0.99 (0.80, 1.23) | 1.03 (0.80, 1.31) |                 |
| Nail product & perfume, little makeup use                                                                   | 1,041 | 1.00 (0.91, 1.09) | 281             | 1.00 (0.84, 1.18) | 1.00 (0.83, 1.22) |                 |
| Some use of perfume & lip moisturizer                                                                       | 952   | 1 (Referent)      | 252             | 1 (Referent)      | 1 (Referent)      |                 |
| Latent classes of hair product use from 10-13 years <sup>e</sup>                                            |       |                   |                 |                   |                   | 0.01            |
| Frequent shampoo, conditioner & hair spray & some hair gel                                                  | 149   | 1.17 (0.98, 1.39) | 30              | 0.72 (0.49, 1.06) | 1.62 (1.06, 2.47) |                 |
| Frequent shampoo & conditioner, some hair spray use                                                         | 645   | 1.09 (0.99, 1.20) | 166             | 0.86 (0.71, 1.04) | 1.27 (1.02, 1.57) |                 |
| Frequent shampoo & conditioner use                                                                          | 353   | 1.08 (0.95, 1.22) | 89              | 0.76 (0.59, 0.97) | 1.42 (1.07, 1.88) |                 |
| Frequent shampoo & some conditioner                                                                         | 1,310 | 1 (Referent)      | 381             | 1 (Referent)      | 1 (Referent)      |                 |
| Latent classes of skincare/hygiene product use from 10-13 years                                             |       |                   |                 |                   |                   | 0.13            |
| Frequent moisturizers, including lotions & oil, some petroleum jelly, cleanser, hygiene products & talc use | 361   | 1.01 (0.89, 1.15) | 84              | 0.76 (0.59, 0.98) | 1.33 (1.00, 1.77) |                 |
| Some moisturizers, including lotions & oil, & talc use                                                      | 445   | 0.92 (0.82, 1.03) | 134             | 0.97 (0.78, 1.20) | 0.95 (0.74, 1.21) |                 |
| Some moisturizers, including lotions & oil, little talc use                                                 | 826   | 1.00 (0.91, 1.10) | 220             | 0.89 (0.74, 1.08) | 1.12 (0.91, 1.39) |                 |
| Little use of any products                                                                                  | 828   | 1 (Referent)      | 229             | 1 (Referent)      | 1 (Referent)      |                 |

CI: Confidence Interval; DCIS: Ductal Carcinoma *In Situ*; HR: Hazard Ratio; NE: Not Estimated; p-het: P-value for test of heterogeneity

<sup>a</sup>Adjusted for birth cohort in ~10-year intervals, family income level growing up (well-off, middle income, low income, poor), and maximum household education level at age 13 (less than high school, high school graduate or equivalent, some college or technical school, 4-year degree or higher) in addition to age as the time scale

<sup>b</sup>P-het from a Wald or joint Wald test of exposure\*modifier interaction term(s)

<sup>c</sup>Proportional hazards assumption violated for strata of DCIS ( $p < 0.05$ )

<sup>d</sup>We did not estimate associations with DCIS or test for heterogeneity by invasiveness if there were less than 5 exposed cases in at least one latent class. To protect participant confidentiality, we do not report exact case numbers if less than 5.

<sup>e</sup>Proportional hazards assumption violated for strata of invasive ( $p < 0.05$ )

**Table S8. Associations between latent classes of self-reported personal care product use during the ages of 10 to 13 years and incident breast cancer by timing of thelarche among non-Hispanic White women in the Sister Study**

|                                                                                                             | Early thelarche (<10 years) |                                                 | Average thelarche (10-13 years) |                                                 | Late thelarche (>13 years) |                                                 | p-het <sup>b</sup> |
|-------------------------------------------------------------------------------------------------------------|-----------------------------|-------------------------------------------------|---------------------------------|-------------------------------------------------|----------------------------|-------------------------------------------------|--------------------|
|                                                                                                             | N cases                     | Multivariable-adjusted HR (95% CI) <sup>a</sup> | N cases                         | Multivariable-adjusted HR (95% CI) <sup>a</sup> | N cases                    | Multivariable-adjusted HR (95% CI) <sup>a</sup> |                    |
| <i>Non-Hispanic White women (n=38,873)<sup>c</sup></i>                                                      |                             |                                                 |                                 |                                                 |                            |                                                 |                    |
| Latent classes of beauty product use from 10-13 years                                                       |                             |                                                 |                                 |                                                 |                            |                                                 | 0.58               |
| Any makeup, nail product & perfume use                                                                      | 31                          | 1.03 (0.62, 1.73)                               | 500                             | 0.98 (0.87, 1.10)                               | 68                         | 1.13 (0.85, 1.51)                               |                    |
| Nail product & perfume, little makeup use                                                                   | 57                          | 1.29 (0.83, 2.02)                               | 1061                            | 0.98 (0.90, 1.07)                               | 196                        | 1.03 (0.84, 1.25)                               |                    |
| Some use of perfume & lip moisturizer                                                                       | 31                          | 1 (Referent)                                    | 946                             | 1 (Referent)                                    | 207                        | 1 (Referent)                                    |                    |
| Latent classes of hair product use from 10-13 years <sup>d</sup>                                            |                             |                                                 |                                 |                                                 |                            |                                                 | 0.38               |
| Frequent shampoo, conditioner & hair spray & some hair gel                                                  | 10                          | 0.90 (0.46, 1.77)                               | 138                             | 0.98 (0.82, 1.18)                               | 26                         | 1.38 (0.91, 2.09)                               |                    |
| Frequent shampoo & conditioner, some hair spray use                                                         | 37                          | 0.95 (0.61, 1.48)                               | 654                             | 1.00 (0.91, 1.11)                               | 119                        | 1.24 (0.98, 1.56)                               |                    |
| Frequent shampoo & conditioner use                                                                          | 14                          | 0.72 (0.39, 1.24)                               | 358                             | 1.02 (0.90, 1.16)                               | 69                         | 0.97 (0.73, 1.30)                               |                    |
| Frequent shampoo & some conditioner                                                                         | 58                          | 1 (Referent)                                    | 1,354                           | 1 (Referent)                                    | 257                        | 1 (Referent)                                    |                    |
| Latent classes of skincare/hygiene product use from 10-13 years                                             |                             |                                                 |                                 |                                                 |                            |                                                 | 0.49               |
| Frequent moisturizers, including lotions & oil, some petroleum jelly, cleanser, hygiene products & talc use | 30                          | 1.07 (0.65, 1.77)                               | 358                             | 0.91 (0.80, 1.03)                               | 55                         | 1.05 (0.77, 1.44)                               |                    |
| Some moisturizers, including lotions & oil, & talc use                                                      | 21                          | 0.64 (0.37, 1.12)                               | 484                             | 0.92 (0.82, 1.03)                               | 72                         | 1.05 (0.80, 1.39)                               |                    |
| Some moisturizers, including lotions & oil, little talc use                                                 | 34                          | 0.82 (0.50, 1.33)                               | 840                             | 0.95 (0.86, 1.05)                               | 164                        | 1.12 (0.89, 1.39)                               |                    |
| Little use of any products                                                                                  | 34                          | 1 (Referent)                                    | 825                             | 1 (Referent)                                    | 180                        | 1 (Referent)                                    |                    |

CI: Confidence Interval; HR: Hazard Ratio; p-het: P-value for test of heterogeneity

<sup>a</sup>Adjusted for birth cohort in ~10-year intervals, family income level growing up (well-off, middle income, low income, poor), and maximum household education level at age 13 (less than high school, high school graduate or equivalent, some college or technical school, 4-year degree or higher) in addition to age as the time scale

<sup>b</sup>P-heterogeneity from a Wald test of exposure\*timing of thelarche interaction terms

<sup>c</sup>439 women missing age at thelarche were excluded from this analysis

<sup>d</sup>Proportional hazards assumption violated for exposure in strata of average thelarche (p<0.05)

**Table S9. Associations between self-reported use of single beauty products during the ages of 10 to 13 years and incident breast cancer by race and ethnicity in the Sister Study, additionally adjusted for number of beauty products used during the ages of 10 to 13 years to address confounding by co-exposure to other products**

| Product             | Black or African American (n=4,049) <sup>a</sup> |                 |                                   | Non-Black Hispanic/Latina (n=2,104) <sup>a</sup> |         |                                   | Non-Hispanic White (n=39,312) <sup>a</sup> |         |                                   |
|---------------------|--------------------------------------------------|-----------------|-----------------------------------|--------------------------------------------------|---------|-----------------------------------|--------------------------------------------|---------|-----------------------------------|
|                     | Use                                              | N cases         | Adjusted HR (95% CI) <sup>b</sup> | Use                                              | N cases | Adjusted HR (95% CI) <sup>b</sup> | Use                                        | N cases | Adjusted HR (95% CI) <sup>b</sup> |
| Mascara             | Frequently or sometimes                          | 13              | 0.77 (0.42, 1.43)                 | Frequently                                       | 5       | 0.70 (0.27, 1.80)                 | Frequently                                 | 109     | 0.94 (0.75, 1.17)                 |
|                     | Did not use                                      | 264             | 1 (Referent)                      | Sometimes                                        | 16      | 0.64 (0.33, 1.22)                 | Sometimes                                  | 447     | 0.89 (0.78, 1.01)                 |
|                     |                                                  |                 |                                   | Did not use                                      | 107     | 1 (Referent)                      | Did not use                                | 2,550   | 1 (Referent)                      |
| Eye shadow          | Frequently or sometimes <sup>c</sup>             | 17              | 1.06 (0.59, 1.89)                 | Frequently or sometimes                          | 20      | 0.50 (0.25, 1.01)                 | Frequently                                 | 62      | 0.86 (0.65, 1.13)                 |
|                     | Did not use <sup>c</sup>                         | 260             | 1 (Referent)                      | Did not use                                      | 108     | 1 (Referent)                      | Sometimes                                  | 443     | 0.94 (0.82, 1.07)                 |
|                     |                                                  |                 |                                   |                                                  |         |                                   | Did not use                                | 2,610   | 1 (Referent)                      |
| Eye liner           | Frequently or sometimes                          | 14              | 0.79 (0.41, 1.49)                 | Frequently                                       | 5       | 1.24 (0.45, 3.43)                 | Frequently                                 | 55      | 1.20 (0.91, 1.59)                 |
|                     | Did not use                                      | 262             | 1 (Referent)                      | Sometimes                                        | 15      | 1.04 (0.55, 1.98)                 | Sometimes                                  | 216     | 0.99 (0.84, 1.17)                 |
|                     |                                                  |                 |                                   | Did not use                                      | 108     | 1 (Referent)                      | Did not use                                | 2,833   | 1 (Referent)                      |
| Lipstick            | Frequently                                       | 13              | 1.88 (1.02, 3.45)                 | Frequently                                       | 8       | 1.03 (0.44, 2.43)                 | Frequently                                 | 163     | 1.25 (1.05, 1.50)                 |
|                     | Sometimes                                        | 34              | 0.98 (0.63, 1.52)                 | Sometimes                                        | 24      | 0.74 (0.41, 1.34)                 | Sometimes                                  | 886     | 1.07 (0.97, 1.18)                 |
|                     | Did not use                                      | 229             | 1 (Referent)                      | Did not use                                      | 96      | 1 (Referent)                      | Did not use                                | 2,039   | 1 (Referent)                      |
| Lip moisturizer     | Frequently                                       | 31              | 1.22 (0.78, 1.91)                 | Frequently                                       | 7       | 0.67 (0.29, 1.54)                 | Frequently                                 | 305     | 0.92 (0.79, 1.06)                 |
|                     | Sometimes                                        | 96              | 1.04 (0.78, 1.39)                 | Sometimes                                        | 43      | 1.13 (0.75, 1.69)                 | Sometimes                                  | 1,302   | 0.94 (0.86, 1.03)                 |
|                     | Did not use                                      | 144             | 1 (Referent)                      | Did not use                                      | 75      | 1 (Referent)                      | Did not use                                | 1,391   | 1 (Referent)                      |
| Foundation          | Frequently or sometimes                          | 14              | 1.42 (0.78, 2.58)                 | Frequently or sometimes                          | 15      | 0.99 (0.54, 1.80)                 | Frequently                                 | 47      | 0.88 (0.65, 1.19)                 |
|                     | Did not use                                      | 262             | 1 (Referent)                      | Did not use                                      | 113     | 1 (Referent)                      | Sometimes                                  | 293     | 1.07 (0.93, 1.23)                 |
|                     |                                                  |                 |                                   |                                                  |         |                                   | Did not use                                | 2,758   | 1 (Referent)                      |
| Blush or rouge      | Frequently or sometimes                          | 17              | 1.02 (0.58, 1.80)                 | Frequently                                       | 6       | 1.36 (0.55, 3.36)                 | Frequently                                 | 71      | 0.99 (0.76, 1.28)                 |
|                     | Did not use                                      | 258             | 1 (Referent)                      | Sometimes                                        | 19      | 0.66 (0.35, 1.24)                 | Sometimes                                  | 526     | 1.04 (0.91, 1.17)                 |
|                     |                                                  |                 |                                   | Did not use                                      | 103     | 1 (Referent)                      | Did not use                                | 2,489   | 1 (Referent)                      |
| Makeup remover      | Frequently or sometimes                          | <5 <sup>d</sup> | NE <sup>d</sup>                   | Frequently or sometimes <sup>c</sup>             | 13      | 1.50 (0.74, 3.05)                 | Frequently                                 | 28      | 1.57 (1.07, 2.31)                 |
|                     | Did not use                                      | 275             | NE <sup>d</sup>                   | Did not use <sup>c</sup>                         | 113     | 1 (Referent)                      | Sometimes                                  | 125     | 1.01 (0.83, 1.23)                 |
|                     |                                                  |                 |                                   |                                                  |         |                                   | Did not use                                | 2,958   | 1 (Referent)                      |
| Nail polish         | Frequently                                       | 30              | 1.08 (0.63, 1.83)                 | Frequently                                       | 11      | 1.34 (0.66, 2.71)                 | Frequently                                 | 177     | 0.86 (0.72, 1.03)                 |
|                     | Sometimes                                        | 138             | 0.86 (0.61, 1.21)                 | Sometimes                                        | 60      | 1.28 (0.78, 2.12)                 | Sometimes                                  | 1,616   | 0.95 (0.86, 1.05)                 |
|                     | Did not use                                      | 96              | 1 (Referent)                      | Did not use                                      | 51      | 1 (Referent)                      | Did not use                                | 1,199   | 1 (Referent)                      |
| Nail polish remover | Frequently                                       | 27              | 1.20 (0.70, 2.04)                 | Frequently                                       | 9       | 1.13 (0.55, 2.30)                 | Frequently                                 | 142     | 0.80 (0.65, 0.97)                 |
|                     | Sometimes                                        | 135             | 0.92 (0.66, 1.29)                 | Sometimes                                        | 61      | 1.26 (0.76, 2.08)                 | Sometimes                                  | 1,569   | 0.94 (0.85, 1.03)                 |
|                     | Did not use                                      | 104             | 1 (Referent)                      | Did not use                                      | 53      | 1 (Referent)                      | Did not use                                | 1,270   | 1 (Referent)                      |
| Cuticle cream       | Frequently <sup>c</sup>                          | 5               | 2.75 (1.17, 6.44)                 | Frequently or sometimes                          | 9       | 0.67 (0.33, 1.38)                 | Frequently                                 | 8       | 0.71 (0.35, 1.41)                 |
|                     | Sometimes <sup>c</sup>                           | 20              | 0.89 (0.54, 1.45)                 | Did not use                                      | 115     | 1 (Referent)                      | Sometimes                                  | 225     | 1.03 (0.89, 1.19)                 |
|                     | Did not use <sup>c</sup>                         | 248             | 1 (Referent)                      |                                                  |         |                                   | Did not use                                | 2,830   | 1 (Referent)                      |

|                                     |                            |                 |                   |                            |     |                   |                            |       |                   |
|-------------------------------------|----------------------------|-----------------|-------------------|----------------------------|-----|-------------------|----------------------------|-------|-------------------|
| Artificial<br>nails or fill-<br>ins | Frequently or<br>sometimes | <5 <sup>d</sup> | NE <sup>d</sup>   | Frequently or<br>sometimes | 5   | 2.84 (1.15, 7.03) | Frequently or<br>sometimes | 19    | 1.07 (0.68, 1.67) |
|                                     | Did not use                | 274             | NE <sup>d</sup>   | Did not use                | 123 | 1 (Referent)      | Did not use                | 3,109 | 1 (Referent)      |
| Perfume or<br>cologne               | Frequently                 | 17              | 0.85 (0.48, 1.50) | Frequently                 | 16  | 0.88 (0.45, 1.74) | Frequently                 | 203   | 1.20 (1.01, 1.42) |
|                                     | Sometimes                  | 147             | 1.11 (0.82, 1.48) | Sometimes                  | 65  | 1.13 (0.71, 1.80) | Sometimes                  | 1,626 | 1.07 (0.98, 1.18) |
|                                     | Did not use                | 106             | 1 (Referent)      | Did not use                | 38  | 1 (Referent)      | Did not use                | 1,159 | 1 (Referent)      |

CI: Confidence Interval; HR: Hazard Ratio; NE: Not Estimated

<sup>a</sup>Participants with missing data on the product of interest are excluded from respective single product model.

<sup>b</sup>Adjusted for birth cohort in ~10-year intervals, family income level growing up (well-off, middle income, low income, poor), maximum household education level at age 13 (less than high school, high school graduate or equivalent, some college or technical school, 4-year degree or higher), and total number of beauty products used during ages 10-13 years (continuous) in addition to age as the time scale

<sup>c</sup>Proportional hazards assumption violated for product use variable ( $p < 0.05$ )

<sup>d</sup>We did not estimate associations for products with less than 5 exposed cases. To protect participant confidentiality, we do not report exact case numbers if less than 5.

**Table S10. Associations between self-reported use of single hair products during the ages of 10 to 13 years and incident breast cancer by race and ethnicity in the Sister Study, additionally adjusted for number of hair products used during the ages of 10 to 13 years to address confounding by co-exposure to other products**

| Product                    | Black or African American (n=4,049) <sup>a</sup> |         |                                   | Non-Black Hispanic/Latina (n=2,104) <sup>a</sup> |         |                                   | Non-Hispanic White (n=39,312) <sup>a</sup> |         |                                   |
|----------------------------|--------------------------------------------------|---------|-----------------------------------|--------------------------------------------------|---------|-----------------------------------|--------------------------------------------|---------|-----------------------------------|
|                            | Use                                              | N cases | Adjusted HR (95% CI) <sup>b</sup> | Use                                              | N cases | Adjusted HR (95% CI) <sup>b</sup> | Use                                        | N cases | Adjusted HR (95% CI) <sup>b</sup> |
| Shampoo                    | Frequently <sup>c</sup>                          | 194     | 1.40 (0.72, 2.75)                 | Frequently                                       | 104     | 1 (Referent)                      | Frequently                                 | 2,756   | 1.02 (0.67, 1.56)                 |
|                            | Sometimes <sup>c</sup>                           | 64      | 1.11 (0.56, 2.21)                 | Sometimes                                        | 11      | 0.64 (0.34, 1.21)                 | Sometimes                                  | 300     | 1.03 (0.67, 1.59)                 |
|                            | Did not use <sup>c</sup>                         | 10      | 1 (Referent)                      | Did not use                                      | 6       | 0.67 (0.27, 1.64)                 | Did not use                                | 23      | 1 (Referent)                      |
| Conditioner or rinse       | Frequently                                       | 74      | 0.97 (0.62, 1.51)                 | Frequently                                       | 53      | 1.44 (0.79, 2.62)                 | Frequently                                 | 920     | 0.99 (0.87, 1.12)                 |
|                            | Sometimes                                        | 93      | 1.21 (0.84, 1.76)                 | Sometimes                                        | 33      | 1.34 (0.74, 2.43)                 | Sometimes                                  | 896     | 1.00 (0.89, 1.12)                 |
|                            | Did not use                                      | 93      | 1 (Referent)                      | Did not use                                      | 33      | 1 (Referent)                      | Did not use                                | 1,167   | 1 (Referent)                      |
| Hair spray                 | Frequently or sometimes                          | 49      | 1.02 (0.70, 1.49)                 | Frequently                                       | 6       | 0.87 (0.34, 2.19)                 | Frequently <sup>c</sup>                    | 260     | 1.08 (0.91, 1.27)                 |
|                            | Did not use                                      | 226     | 1 (Referent)                      | Sometimes                                        | 38      | 0.95 (0.57, 1.56)                 | Sometimes <sup>c</sup>                     | 969     | 1.03 (0.92, 1.16)                 |
|                            |                                                  |         |                                   | Did not use                                      | 80      | 1 (Referent)                      | Did not use <sup>c</sup>                   | 1,784   | 1 (Referent)                      |
| Hair styling gel or mousse | Frequently or sometimes                          | 27      | 0.84 (0.52, 1.36)                 | Frequently or sometimes                          | 15      | 0.67 (0.35, 1.28)                 | Frequently <sup>c</sup>                    | 79      | 1.02 (0.80, 1.30)                 |
|                            | Did not use                                      | 246     | 1 (Referent)                      | Did not use                                      | 113     | 1 (Referent)                      | Sometimes <sup>c</sup>                     | 371     | 0.93 (0.81, 1.07)                 |
|                            |                                                  |         |                                   |                                                  |         |                                   | Did not use <sup>c</sup>                   | 2,605   | 1 (Referent)                      |
| Pomade or hair grease      | Frequently                                       | 214     | 1.50 (0.77, 2.92)                 | Frequently                                       | 11      | 2.40 (1.24, 4.67)                 | Frequently                                 | 6       | 1.61 (0.72, 3.56)                 |
|                            | Sometimes                                        | 50      | 1.72 (0.85, 3.48)                 | Sometimes                                        | 11      | 0.78 (0.39, 1.52)                 | Sometimes                                  | 52      | 0.96 (0.72, 1.27)                 |
|                            | Did not use                                      | 10      | 1 (Referent)                      | Did not use                                      | 103     | 1 (Referent)                      | Did not use                                | 3,056   | 1 (Referent)                      |
| Hair food                  | Frequently                                       | 16      | 1.03 (0.53, 1.82)                 | Frequently or sometimes                          | 10      | 0.85 (0.42, 1.73)                 | Frequently or sometimes                    | 9       | 1.12 (0.58, 2.16)                 |
|                            | Sometimes                                        | 46      | 0.80 (0.53, 1.18)                 | Did not use                                      | 117     | 1 (Referent)                      | Did not use                                | 3,082   | 1 (Referent)                      |
|                            | Did not use                                      | 207     | 1 (Referent)                      |                                                  |         |                                   |                                            |         |                                   |

CI: Confidence Interval; HR: Hazard Ratio

<sup>a</sup>Participants with missing data on the product of interest are excluded from respective single product model.

<sup>b</sup>Adjusted for birth cohort in ~10-year intervals, family income level growing up (well-off, middle income, low income, poor), maximum household education level at age 13 (less than high school, high school graduate or equivalent, some college or technical school, 4-year degree or higher), and total number of hair products used during ages 10-13 years (continuous), in addition to age as the time scale

<sup>c</sup>Proportional hazards assumption violated for product use variable (p<0.05)



**Table S11. Associations between self-reported use of single skincare/hygiene products during the ages of 10 to 13 years and incident breast cancer by race and ethnicity in the Sister Study, additionally adjusted for number of skincare/hygiene products used during the ages of 10 to 13 years to address confounding by co-exposure to other products**

| Product                         | Use                      | Black or African American (n=4,049) <sup>a</sup> |                                   | Non-Black Hispanic/Latina (n=2,104) <sup>a</sup> |                 | Non-Hispanic White (n=39,312) <sup>a</sup> |                          |         |                                   |
|---------------------------------|--------------------------|--------------------------------------------------|-----------------------------------|--------------------------------------------------|-----------------|--------------------------------------------|--------------------------|---------|-----------------------------------|
|                                 |                          | N cases                                          | Adjusted HR (95% CI) <sup>b</sup> | Use                                              | N cases         | Adjusted HR (95% CI) <sup>b</sup>          | Use                      | N cases | Adjusted HR (95% CI) <sup>b</sup> |
| Body lotions or creams          | Frequently               | 157                                              | 1.18 (0.75, 1.86)                 | Frequently                                       | 28              | 1.55 (0.88, 2.75)                          | Frequently               | 250     | 0.93 (0.79, 1.09)                 |
|                                 | Sometimes                | 81                                               | 1.26 (0.80, 1.97)                 | Sometimes                                        | 41              | 1.21 (0.72, 2.04)                          | Sometimes                | 1,305   | 0.97 (0.88, 1.07)                 |
|                                 | Did not use              | 34                                               | 1 (Referent)                      | Did not use                                      | 53              | 1 (Referent)                               | Did not use              | 1,415   | 1 (Referent)                      |
| Hand lotions or creams          | Frequently               | 124                                              | 0.98 (0.65, 1.47)                 | Frequently                                       | 22              | 1.22 (0.67, 2.24)                          | Frequently               | 283     | 0.85 (0.73, 0.98)                 |
|                                 | Sometimes                | 105                                              | 1.14 (0.77, 1.68)                 | Sometimes                                        | 50              | 1.25 (0.77, 2.03)                          | Sometimes                | 1,577   | 0.93 (0.85, 1.02)                 |
|                                 | Did not use              | 38                                               | 1 (Referent)                      | Did not use                                      | 49              | 1 (Referent)                               | Did not use              | 1,100   | 1 (Referent)                      |
| Foot lotions or creams          | Frequently               | 25                                               | 0.90 (0.58, 1.39)                 | Frequently or sometimes                          | 21              | 1.43 (0.85, 2.41)                          | Frequently               | 12      | 0.67 (0.38, 1.17)                 |
|                                 | Sometimes                | 35                                               | 0.77 (0.52, 1.15)                 | Did not use                                      | 102             | 1 (Referent)                               | Sometimes                | 144     | 0.86 (0.72, 1.03)                 |
|                                 | Did not use              | 213                                              | 1 (Referent)                      | Did not use                                      | 102             | 1 (Referent)                               | Did not use              | 2,919   | 1 (Referent)                      |
| Baby oil or mineral-based oils  | Frequently <sup>c</sup>  | 55                                               | 1.27 (0.87, 1.86)                 | Frequently                                       | 7               | 1.26 (0.55, 2.93)                          | Frequently               | 172     | 0.99 (0.84, 1.17)                 |
|                                 | Sometimes <sup>c</sup>   | 113                                              | 1.27 (0.92, 1.75)                 | Sometimes                                        | 36              | 0.90 (0.55, 1.48)                          | Sometimes                | 1,253   | 0.99 (0.91, 1.08)                 |
|                                 | Did not use <sup>c</sup> | 101                                              | 1 (Referent)                      | Did not use                                      | 79              | 1 (Referent)                               | Did not use              | 1,589   | 1 (Referent)                      |
| Petroleum jelly                 | Frequently               | 139                                              | 1.12 (0.78, 1.62)                 | Frequently or sometimes                          | 24              | 0.98 (0.61, 1.58)                          | Frequently               | 48      | 0.95 (0.71, 1.26)                 |
|                                 | Sometimes                | 94                                               | 0.97 (0.66, 1.42)                 | Did not use                                      | 100             | 1 (Referent)                               | Sometimes                | 599     | 0.98 (0.89, 1.08)                 |
|                                 | Did not use              | 42                                               | 1 (Referent)                      | Did not use                                      | 100             | 1 (Referent)                               | Did not use              | 2,352   | 1 (Referent)                      |
| Skin lighteners                 | Frequently or sometimes  | 17                                               | 1.15 (0.69, 1.92)                 | Frequently or sometimes                          | <5 <sup>d</sup> | NE <sup>d</sup>                            | Frequently or sometimes  | 5       | 0.99 (0.41, 2.40)                 |
|                                 | Did not use              | 261                                              | 1 (Referent)                      | Did not use                                      | 128             | NE <sup>d</sup>                            | Did not use              | 3,129   | 1 (Referent)                      |
| Self-tanning products           | Frequently or sometimes  | <5 <sup>d</sup>                                  | NE <sup>d</sup>                   | Frequently or sometimes                          | 6               | 1.11 (0.47, 2.61)                          | Frequently               | 9       | 0.97 (0.50, 1.84)                 |
|                                 | Did not use              | 276                                              | NE <sup>d</sup>                   | Did not use                                      | 121             | 1 (Referent)                               | Sometimes                | 147     | 0.95 (0.80, 1.13)                 |
|                                 | Did not use              | 276                                              | NE <sup>d</sup>                   | Did not use                                      | 121             | 1 (Referent)                               | Did not use              | 2,965   | 1 (Referent)                      |
| Bath or shower gel              | Frequently               | 19                                               | 1.03 (0.63, 1.69)                 | Frequently or sometimes                          | 8               | 0.71 (0.33, 1.54)                          | Frequently               | 44      | 1.16 (0.86, 1.57)                 |
|                                 | Sometimes                | 26                                               | 0.95 (0.61, 1.47)                 | Did not use                                      | 115             | 1 (Referent)                               | Sometimes                | 121     | 0.95 (0.79, 1.15)                 |
|                                 | Did not use              | 231                                              | 1 (Referent)                      | Did not use                                      | 115             | 1 (Referent)                               | Did not use              | 2,919   | 1 (Referent)                      |
| Shaving cream or gel            | Frequently or sometimes  | 20                                               | 0.84 (0.52, 1.36)                 | Frequently or sometimes                          | 25              | 1.05 (0.64, 1.74)                          | Frequently               | 130     | 1.17 (0.97, 1.41)                 |
|                                 | Did not use              | 253                                              | 1 (Referent)                      | Did not use                                      | 99              | 1 (Referent)                               | Sometimes                | 669     | 1.04 (0.95, 1.15)                 |
| Deodorant and/or antiperspirant | Frequently               | 224                                              | 1.46 (0.85, 2.51)                 | Frequently                                       | 60              | 0.94 (0.55, 1.59)                          | Frequently               | 1,336   | 1.05 (0.95, 1.17)                 |
|                                 | Sometimes                | 31                                               | 0.91 (0.49, 1.69)                 | Sometimes                                        | 24              | 0.87 (0.50, 1.54)                          | Sometimes                | 861     | 0.97 (0.87, 1.08)                 |
|                                 | Did not use              | 16                                               | 1 (Referent)                      | Did not use                                      | 31              | 1 (Referent)                               | Did not use              | 740     | 1 (Referent)                      |
| Face cream or moisturizer       | Frequently               | 24                                               | 0.88 (0.57, 1.37)                 | Frequently                                       | 6               | 0.71 (0.30, 1.66)                          | Frequently <sup>c</sup>  | 107     | 0.97 (0.80, 1.19)                 |
|                                 | Sometimes                | 40                                               | 0.84 (0.57, 1.23)                 | Sometimes                                        | 15              | 1.04 (0.57, 1.91)                          | Sometimes <sup>c</sup>   | 438     | 1.04 (0.93, 1.16)                 |
|                                 | Did not use              | 210                                              | 1 (Referent)                      | Did not use                                      | 106             | 1 (Referent)                               | Did not use <sup>c</sup> | 2,522   | 1 (Referent)                      |

|                               |                         |     |                   |                         |     |                   |                         |       |                   |
|-------------------------------|-------------------------|-----|-------------------|-------------------------|-----|-------------------|-------------------------|-------|-------------------|
| Cleansing cream               | Frequently              | 8   | 0.50 (0.24, 1.04) | Frequently              | 5   | 0.95 (0.37, 2.43) | Frequently              | 117   | 0.99 (0.82, 1.20) |
|                               | Sometimes               | 23  | 0.52 (0.33, 0.83) | Sometimes               | 17  | 1.09 (0.62, 1.93) | Sometimes               | 456   | 1.08 (0.97, 1.20) |
|                               | Did not use             | 245 | 1 (Referent)      | Did not use             | 105 | 1 (Referent)      | Did not use             | 2,498 | 1 (Referent)      |
| Face masks                    | Frequently or sometimes | 13  | 1.21 (0.67, 2.17) | Frequently or sometimes | 12  | 1.39 (0.69, 2.81) | Frequently or sometimes | 190   | 1.18 (1.00, 1.38) |
|                               | Did not use             | 265 | 1 (Referent)      | Did not use             | 115 | 1 (Referent)      | Did not use             | 2,927 | 1 (Referent)      |
| Blemish or acne products      | Frequently              | 20  | 1.10 (0.67, 1.81) | Frequently              | 8   | 0.77 (0.35, 1.72) | Frequently              | 473   | 1.23 (1.09, 1.37) |
|                               | Sometimes               | 60  | 0.99 (0.72, 1.37) | Sometimes               | 33  | 1.04 (0.63, 1.69) | Sometimes               | 1,094 | 1.12 (1.03, 1.23) |
|                               | Did not use             | 196 | 1 (Referent)      | Did not use             | 85  | 1 (Referent)      | Did not use             | 1,500 | 1 (Referent)      |
| Mouthwash or rinse            | Frequently              | 71  | 1.11 (0.79, 1.57) | Frequently              | 7   | 0.66 (0.29, 1.51) | Frequently              | 129   | 1.12 (0.93, 1.34) |
|                               | Sometimes               | 100 | 0.99 (0.73, 1.34) | Sometimes               | 32  | 0.94 (0.58, 1.50) | Sometimes               | 762   | 0.98 (0.89, 1.08) |
|                               | Did not use             | 99  | 1 (Referent)      | Did not use             | 77  | 1 (Referent)      | Did not use             | 2,065 | 1 (Referent)      |
| Talcum powder under arms      | Frequently              | 24  | 1.14 (0.73, 1.80) | Frequently              | 6   | 1.14 (0.47, 2.76) | Frequently              | 89    | 0.97 (0.78, 1.21) |
|                               | Sometimes               | 93  | 1.05 (0.79, 1.40) | Sometimes               | 27  | 0.97 (0.61, 1.56) | Sometimes               | 609   | 0.94 (0.85, 1.04) |
|                               | Did not use             | 149 | 1 (Referent)      | Did not use             | 89  | 1 (Referent)      | Did not use             | 2,239 | 1 (Referent)      |
| Talcum powder on vaginal area | Frequently              | 25  | 1.09 (0.69, 1.72) | Frequently or sometimes | 16  | 0.85 (0.50, 1.46) | Frequently              | 73    | 1.01 (0.80, 1.28) |
|                               | Sometimes               | 72  | 0.88 (0.65, 1.19) | Did not use             | 111 | 1 (Referent)      | Sometimes               | 429   | 0.93 (0.83, 1.04) |
|                               | Did not use             | 177 | 1 (Referent)      | Did not use             | 111 | 1 (Referent)      | Did not use             | 2,511 | 1 (Referent)      |
| Talcum powder on other areas  | Frequently              | 36  | 0.91 (0.59, 1.38) | Frequently              | 7   | 0.81 (0.36, 1.83) | Frequently              | 121   | 0.94 (0.77, 1.14) |
|                               | Sometimes               | 127 | 0.96 (0.71, 1.29) | Sometimes               | 41  | 0.86 (0.55, 1.35) | Sometimes               | 1,074 | 0.92 (0.84, 1.01) |
|                               | Did not use             | 105 | 1 (Referent)      | Did not use             | 69  | 1 (Referent)      | Did not use             | 1,717 | 1 (Referent)      |

CI: Confidence Interval; HR: Hazard Ratio; NE: Not Estimated

<sup>a</sup>Participants with missing data on the product of interest are excluded from respective single product model.

<sup>b</sup>Adjusted for birth cohort in ~10-year intervals, family income level growing up (well-off, middle income, low income, poor), maximum household education level at age 13 (less than high school, high school graduate or equivalent, some college or technical school, 4-year degree or higher), and total number of skincare/hygiene products used during ages 10-13 years (continuous), in addition to age as the time scale

<sup>c</sup>Proportional hazards assumption violated for product use variable ( $p < 0.05$ )

<sup>d</sup>We did not estimate associations for products with less than 5 exposed cases. To protect participant confidentiality, we do not report exact case numbers if less than 5.

**Table S12. Sensitivity analyses for the associations between self-reported latent classes of product use and use of individual products during the ages of 10 to 13 years with incident breast cancer among Black or African American participants in the Sister Study, restricted to participants who identify as monoracial and non-Latina (n=3,697)**

| Beauty products                        |                         |         |                                     | Hair products                                                                 |                          |         |                                     | Skincare/hygiene products                                                                                   |                          |         |                                     |
|----------------------------------------|-------------------------|---------|-------------------------------------|-------------------------------------------------------------------------------|--------------------------|---------|-------------------------------------|-------------------------------------------------------------------------------------------------------------|--------------------------|---------|-------------------------------------|
| Latent class                           |                         | N cases | Adjusted HR (95% CI) <sup>a</sup>   | Latent class                                                                  |                          | N cases | Adjusted HR (95% CI) <sup>a</sup>   | Latent class <sup>b</sup>                                                                                   |                          | N cases | Adjusted HR (95% CI) <sup>a</sup>   |
| Any makeup, nail product & perfume use |                         | 23      | 1.17 (0.74, 1.85)                   | Frequent shampoo, conditioner & pomade, some hair spray, hair gel & hair food |                          | 47      | 1.34 (0.94, 1.92)                   | Frequent moisturizers, including lotions, oil & petroleum jelly, some cleanser, hygiene products & talc use |                          | 64      | 1.10 (0.74, 1.63)                   |
| Frequent nail product & perfume use    |                         | 22      | 1.37 (0.86, 2.18)                   | Frequent shampoo, conditioner & pomade                                        |                          | 95      | 1.20 (0.90, 1.61)                   | Frequent lotions, some use of other moisturizers & little talc use                                          |                          | 72      | 1.22 (0.84, 1.78)                   |
| Some nail product & perfume use        |                         | 111     | 0.83 (0.63, 1.09)                   | Frequent pomade & some shampoo                                                |                          | 112     | 1 (Referent)                        | Some moisturizers, including lotions, oil & petroleum jelly, & talc use                                     |                          | 75      | 1.06 (0.73, 1.54)                   |
| Some use of perfume & lip moisturizer  |                         | 98      | 1 (Referent)                        |                                                                               |                          |         |                                     | Some use of lotions & petroleum jelly                                                                       |                          | 43      | 1 (Referent)                        |
| Product                                | Use                     | N cases | Adjusted HR (95% CI) <sup>a,c</sup> | Product                                                                       | Use                      | N cases | Adjusted HR (95% CI) <sup>a,c</sup> | Product                                                                                                     | Use                      | N cases | Adjusted HR (95% CI) <sup>a,c</sup> |
| Mascara                                | Frequently or sometimes | 13      | 1.06 (0.61, 1.85)                   | Shampoo                                                                       | Frequently <sup>c</sup>  | 173     | 1.30 (0.69, 2.43)                   | Body lotions or creams                                                                                      | Frequently               | 146     | 1.32 (0.84, 2.07)                   |
|                                        | Did not use             | 238     | 1 (Referent)                        |                                                                               | Sometimes <sup>c</sup>   | 60      | 1.07 (0.55, 2.07)                   |                                                                                                             | Sometimes                | 75      | 1.47 (0.92, 2.34)                   |
| Eye shadow                             | Frequently or sometimes | 16      | 1.30 (0.77, 2.18)                   | Conditioner or rinse                                                          | Did not use <sup>c</sup> | 10      | 1 (Referent)                        | Hand lotions or creams                                                                                      | Did not use              | 25      | 1 (Referent)                        |
|                                        | Did not use             | 235     | 1 (Referent)                        |                                                                               | Frequently               | 66      | 1.07 (0.75, 1.53)                   |                                                                                                             | Frequently               | 113     | 1.04 (0.70, 1.55)                   |
| Eye liner                              | Frequently or sometimes | 13      | 0.98 (0.56, 1.73)                   | Hair spray                                                                    | Sometimes                | 86      | 1.35 (0.99, 1.85)                   | Foot lotions or creams                                                                                      | Sometimes                | 97      | 1.25 (0.83, 1.87)                   |
|                                        | Did not use             | 237     | 1 (Referent)                        |                                                                               | Did not use              | 83      | 1 (Referent)                        |                                                                                                             | Did not use              | 31      | 1 (Referent)                        |
| Lipstick                               | Frequently              | 12      | 2.31 (1.30, 4.11)                   | Hair styling gel or mousse                                                    | Frequently or sometimes  | 43      | 1.15 (0.83, 1.60)                   | Baby oil or mineral-based oils                                                                              | Frequently <sup>b</sup>  | 51      | 1.25 (0.88, 1.77)                   |
|                                        | Sometimes               | 31      | 1.03 (0.71, 1.50)                   |                                                                               | Did not use              | 206     | 1 (Referent)                        |                                                                                                             | Sometimes <sup>b</sup>   | 105     | 1.27 (0.95, 1.69)                   |
| Lip moisturizer                        | Did not use             | 207     | 1 (Referent)                        | Pomade or hair grease                                                         | Did not use              | 224     | 1 (Referent)                        | Petroleum jelly                                                                                             | Did not use <sup>b</sup> | 90      | 1 (Referent)                        |
|                                        | Frequently              | 30      | 1.35 (0.90, 2.03)                   |                                                                               | Frequently               | 199     | 1.58 (0.69, 3.62)                   |                                                                                                             | Frequently <sup>b</sup>  | 130     | 1.26 (0.85, 1.88)                   |
| Foundation                             | Sometimes               | 88      | 1.09 (0.82, 1.44)                   | Hair food                                                                     | Sometimes                | 45      | 1.89 (0.80, 4.47)                   | Skin lighteners                                                                                             | Sometimes <sup>b</sup>   | 90      | 1.14 (0.76, 1.73)                   |
|                                        | Did not use             | 128     | 1 (Referent)                        |                                                                               | Did not use              | 6       | 1 (Referent)                        |                                                                                                             | Did not use <sup>b</sup> | 29      | 1 (Referent)                        |
|                                        | Frequently or sometimes | 14      | 1.85 (1.07, 3.17)                   |                                                                               | Frequently               | 15      | 1.21 (0.69, 2.13)                   |                                                                                                             | Frequently or sometimes  | 17      | 1.30 (0.80, 2.14)                   |
|                                        |                         |         |                                     |                                                                               | Sometimes                | 42      | 0.92 (0.64, 1.32)                   |                                                                                                             |                          |         |                                     |

|                              |                         |                 |                   |             |     |              |                                 |                         |                 |                   |
|------------------------------|-------------------------|-----------------|-------------------|-------------|-----|--------------|---------------------------------|-------------------------|-----------------|-------------------|
|                              | Did not use             | 236             | 1 (Referent)      | Did not use | 187 | 1 (Referent) | Did not use                     | 235                     | 1 (Referent)    |                   |
| Blush or rouge               | Frequently or sometimes | 16              | 1.27 (0.76, 2.10) |             |     |              | Self-tanning products           | Frequently or sometimes | <5 <sup>d</sup> | NE <sup>d</sup>   |
|                              | Did not use             | 233             | 1 (Referent)      |             |     |              |                                 | Did not use             | 250             | NE <sup>d</sup>   |
| Makeup remover               | Frequently or sometimes | <5 <sup>d</sup> | NE <sup>d</sup>   |             |     |              | Bath or shower gel              | Frequently              | 17              | 1.01 (0.62, 1.67) |
|                              | Did not use             | 249             | NE <sup>d</sup>   |             |     |              |                                 | Sometimes               | 23              | 0.97 (0.62, 1.50) |
| Nail polish                  | Did not use             | 249             | NE <sup>d</sup>   |             |     |              | Shaving cream or gel            | Did not use             | 210             | 1 (Referent)      |
|                              | Frequently              | 29              | 1.27 (0.83, 1.95) |             |     |              |                                 | Frequently or sometimes | 19              | 0.99 (0.61, 1.60) |
|                              | Sometimes               | 122             | 0.91 (0.69, 1.20) |             |     |              |                                 | Did not use             | 229             | 1 (Referent)      |
| Nail polish remover          | Did not use             | 88              | 1 (Referent)      |             |     |              | Deodorant and/or antiperspirant | Did not use             | 229             | 1 (Referent)      |
|                              | Frequently              | 26              | 1.34 (0.87, 2.08) |             |     |              |                                 | Frequently              | 204             | 1.50 (0.85, 2.66) |
|                              | Sometimes               | 119             | 0.93 (0.71, 1.22) |             |     |              |                                 | Sometimes               | 29              | 1.01 (0.52, 1.97) |
| Cuticle cream                | Did not use             | 96              | 1 (Referent)      |             |     |              | Face cream or moisturizer       | Did not use             | 13              | 1 (Referent)      |
|                              | Frequently              | <5 <sup>d</sup> | NE <sup>d</sup>   |             |     |              |                                 | Frequently              | 23              | 1.03 (0.67, 1.59) |
|                              | Sometimes               | 18              | NE <sup>d</sup>   |             |     |              |                                 | Sometimes               | 39              | 1.00 (0.71, 1.41) |
| Artificial nails or fill-ins | Did not use             | 226             | NE <sup>d</sup>   |             |     |              | Cleansing cream                 | Did not use             | 186             | 1 (Referent)      |
|                              | Frequently or sometimes | <5 <sup>d</sup> | NE <sup>d</sup>   |             |     |              |                                 | Frequently              | 8               | 0.63 (0.31, 1.29) |
|                              | Did not use             | 250             | NE <sup>d</sup>   |             |     |              |                                 | Sometimes               | 21              | 0.63 (0.40, 0.99) |
| Perfume or cologne           | Did not use             | 250             | NE <sup>d</sup>   |             |     |              | Face masks                      | Did not use             | 221             | 1 (Referent)      |
|                              | Frequently              | 17              | 0.93 (0.55, 1.56) |             |     |              |                                 | Frequently or sometimes | 13              | 1.54 (0.87, 2.72) |
|                              | Sometimes               | 129             | 1.05 (0.80, 1.36) |             |     |              |                                 | Did not use             | 239             | 1 (Referent)      |
|                              |                         |                 |                   |             |     |              | Blemish or acne products        | Did not use             | 179             | 1 (Referent)      |
|                              |                         |                 |                   |             |     |              |                                 | Frequently              | 18              | 1.16 (0.82, 1.87) |
|                              |                         |                 |                   |             |     |              |                                 | Sometimes               | 53              | 1.01 (0.74, 1.37) |
|                              |                         |                 |                   |             |     |              | Mouthwash or rinse              | Did not use             | 179             | 1 (Referent)      |
|                              |                         |                 |                   |             |     |              |                                 | Frequently              | 63              | 1.11 (0.80, 1.54) |
|                              |                         |                 |                   |             |     |              |                                 | Sometimes               | 95              | 1.06 (0.79, 1.42) |
|                              |                         |                 |                   |             |     |              | Talcum powder under arms        | Did not use             | 87              | 1 (Referent)      |
|                              |                         |                 |                   |             |     |              |                                 | Frequently              | 23              | 1.22 (0.78, 1.90) |
|                              |                         |                 |                   |             |     |              |                                 | Sometimes               | 85              | 1.05 (0.80, 1.38) |
|                              |                         |                 |                   |             |     |              | Talcum powder on vaginal area   | Did not use             | 135             | 1 (Referent)      |
|                              |                         |                 |                   |             |     |              |                                 | Frequently              | 23              | 1.12 (0.72, 1.75) |
|                              |                         |                 |                   |             |     |              |                                 | Sometimes               | 66              | 0.90 (0.68, 1.20) |
|                              |                         |                 |                   |             |     |              | Talcum powder on other areas    | Did not use             | 159             | 1 (Referent)      |
|                              |                         |                 |                   |             |     |              |                                 | Frequently              | 30              | 0.88 (0.59, 1.33) |
|                              |                         |                 |                   |             |     |              |                                 | Sometimes               | 118             | 1.01 (0.77, 1.33) |
|                              |                         |                 |                   |             |     |              | Did not use                     | 96                      | 1 (Referent)    |                   |

CI: Confidence Interval; HR: Hazard Ratio; NE: Not Estimated

<sup>a</sup>Adjusted for birth cohort in ~10-year intervals, family income level growing up (well-off, middle income, low income, poor), and maximum household education level at age 13 (less than high school, high school graduate or equivalent, some college or technical school, 4-year degree or higher), plus age as the time scale

<sup>b</sup>Proportional hazards assumption violated for product use variable (p<0.05)

<sup>c</sup>Participants with missing data on the product of interest are excluded from respective single product model.

<sup>d</sup>We did not estimate associations for products with less than 5 exposed cases. To protect participant confidentiality, we do not report exact case numbers if less than 5.

**Figure S1. Flow chart of eligible Sister Study participants for this analysis**

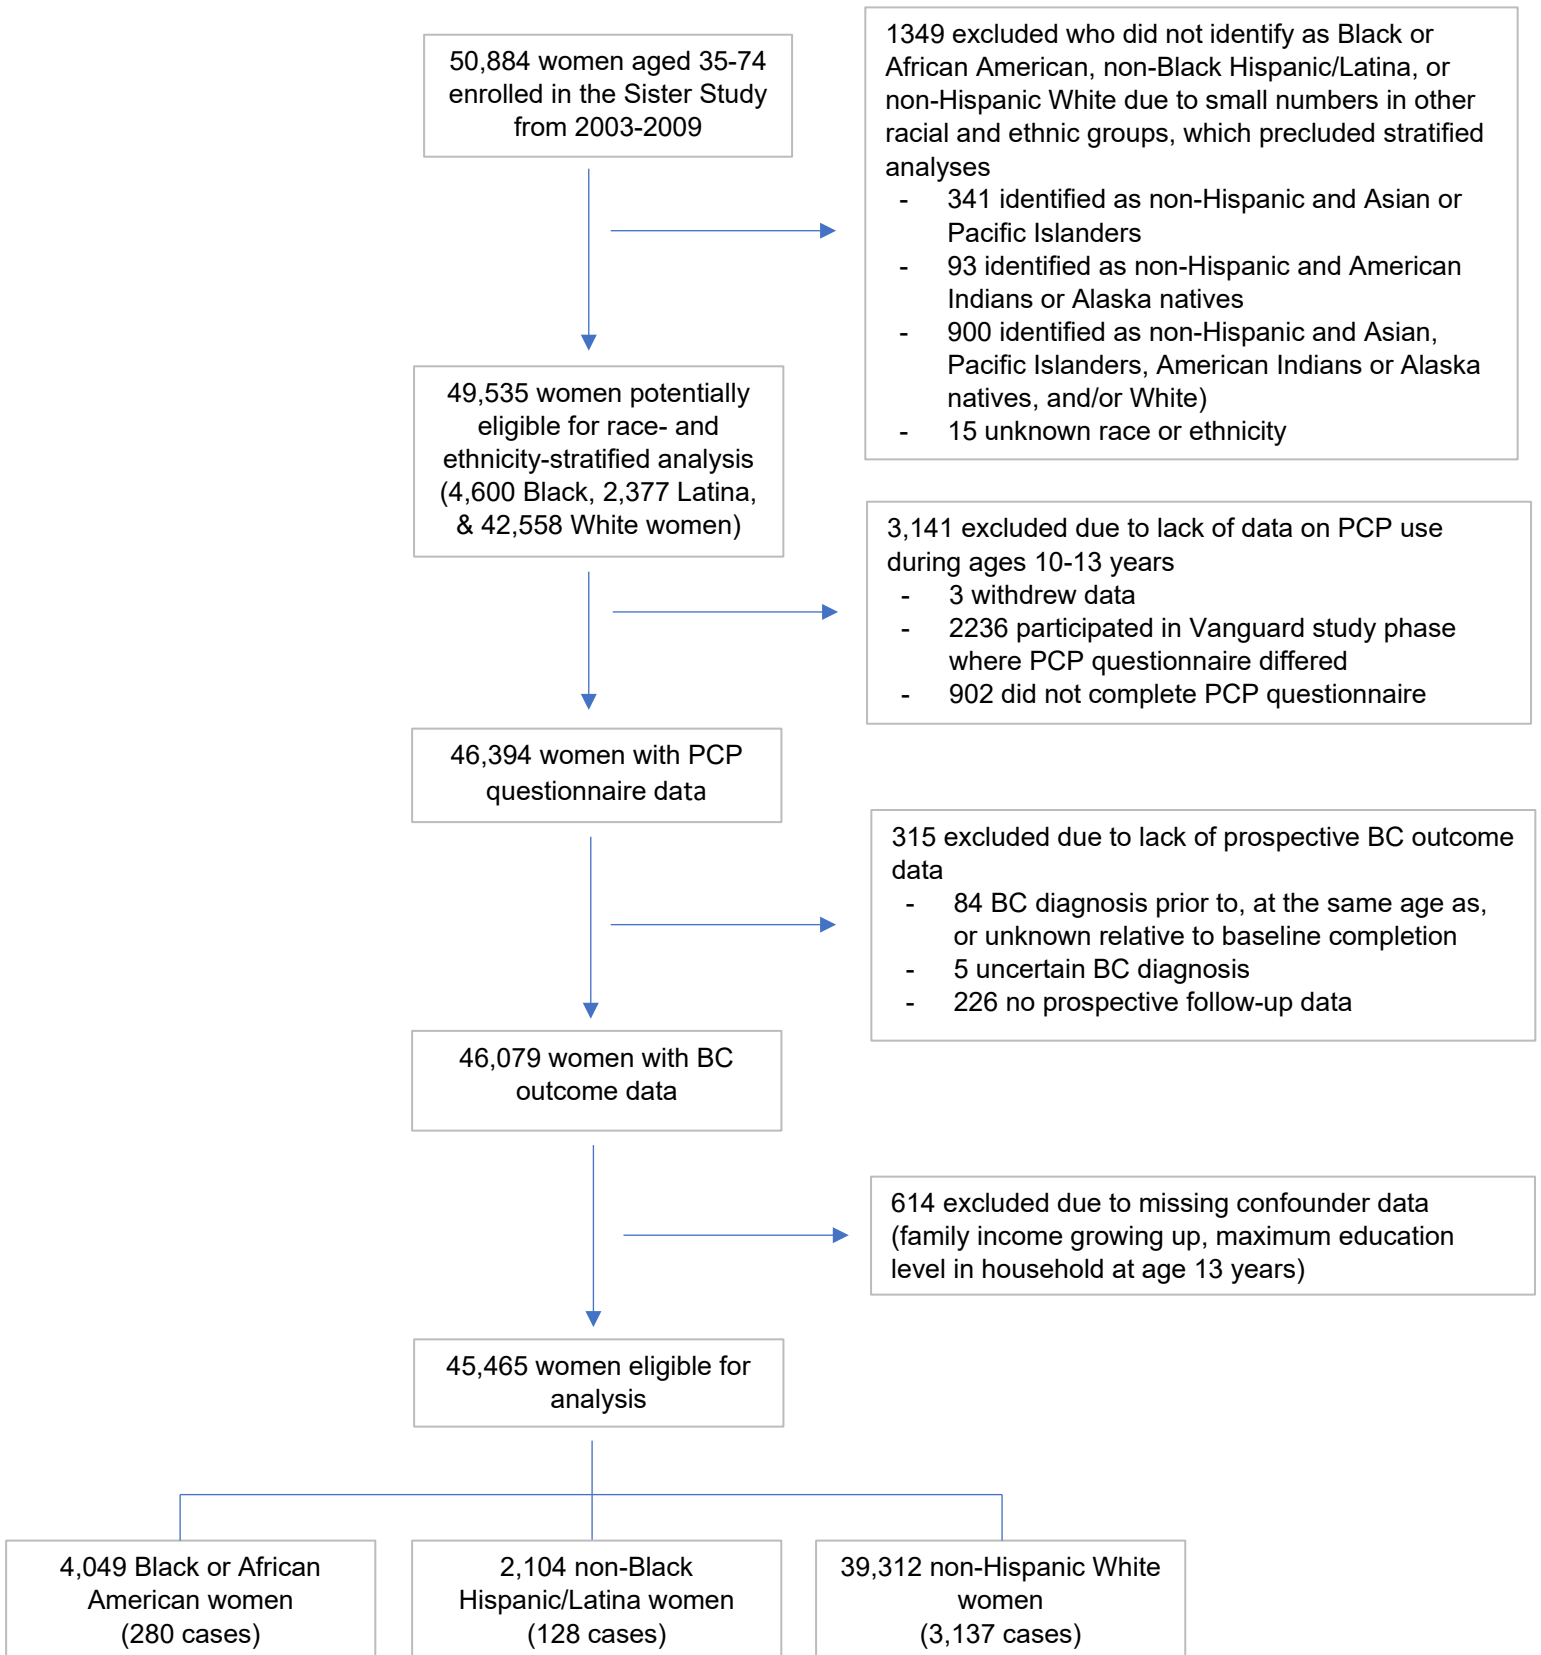

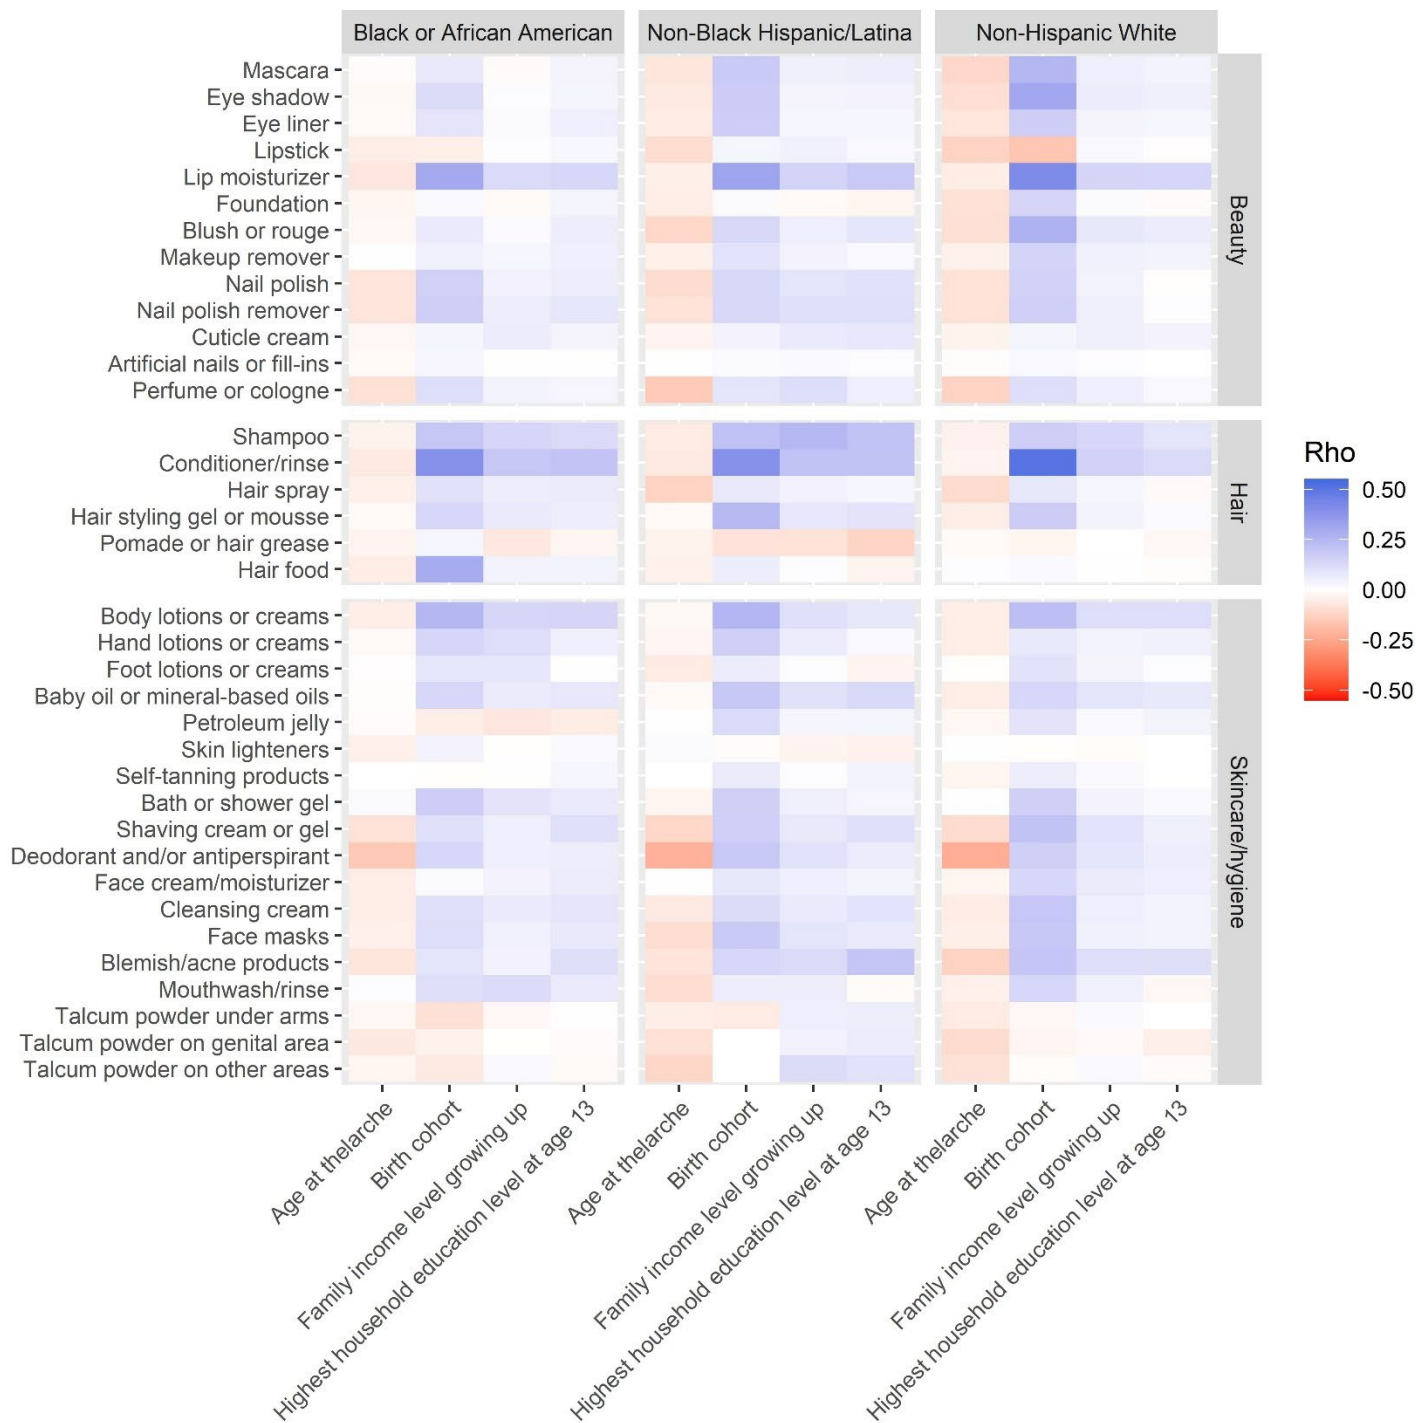

**Figure S2. Heatmap of Spearman correlation coefficients (rho) between self-reported frequency of personal care product use during the ages of 10 to 13 years and covariates by race and ethnicity in the Sister Study.** Product use frequency (did not use, sometimes used, frequently used) coded as an ordinal variable. Covariates are coded as follows: age at thelarche in years (continuous), birth cohort in ~10-year intervals (ordinal, higher values indicating later birth cohorts), family income level growing up (ordinal, higher values indicating higher income levels), highest household education level at age 13 (ordinal, higher values indicating higher education). Numeric data used to generate this figure can be found in Excel Table S1.

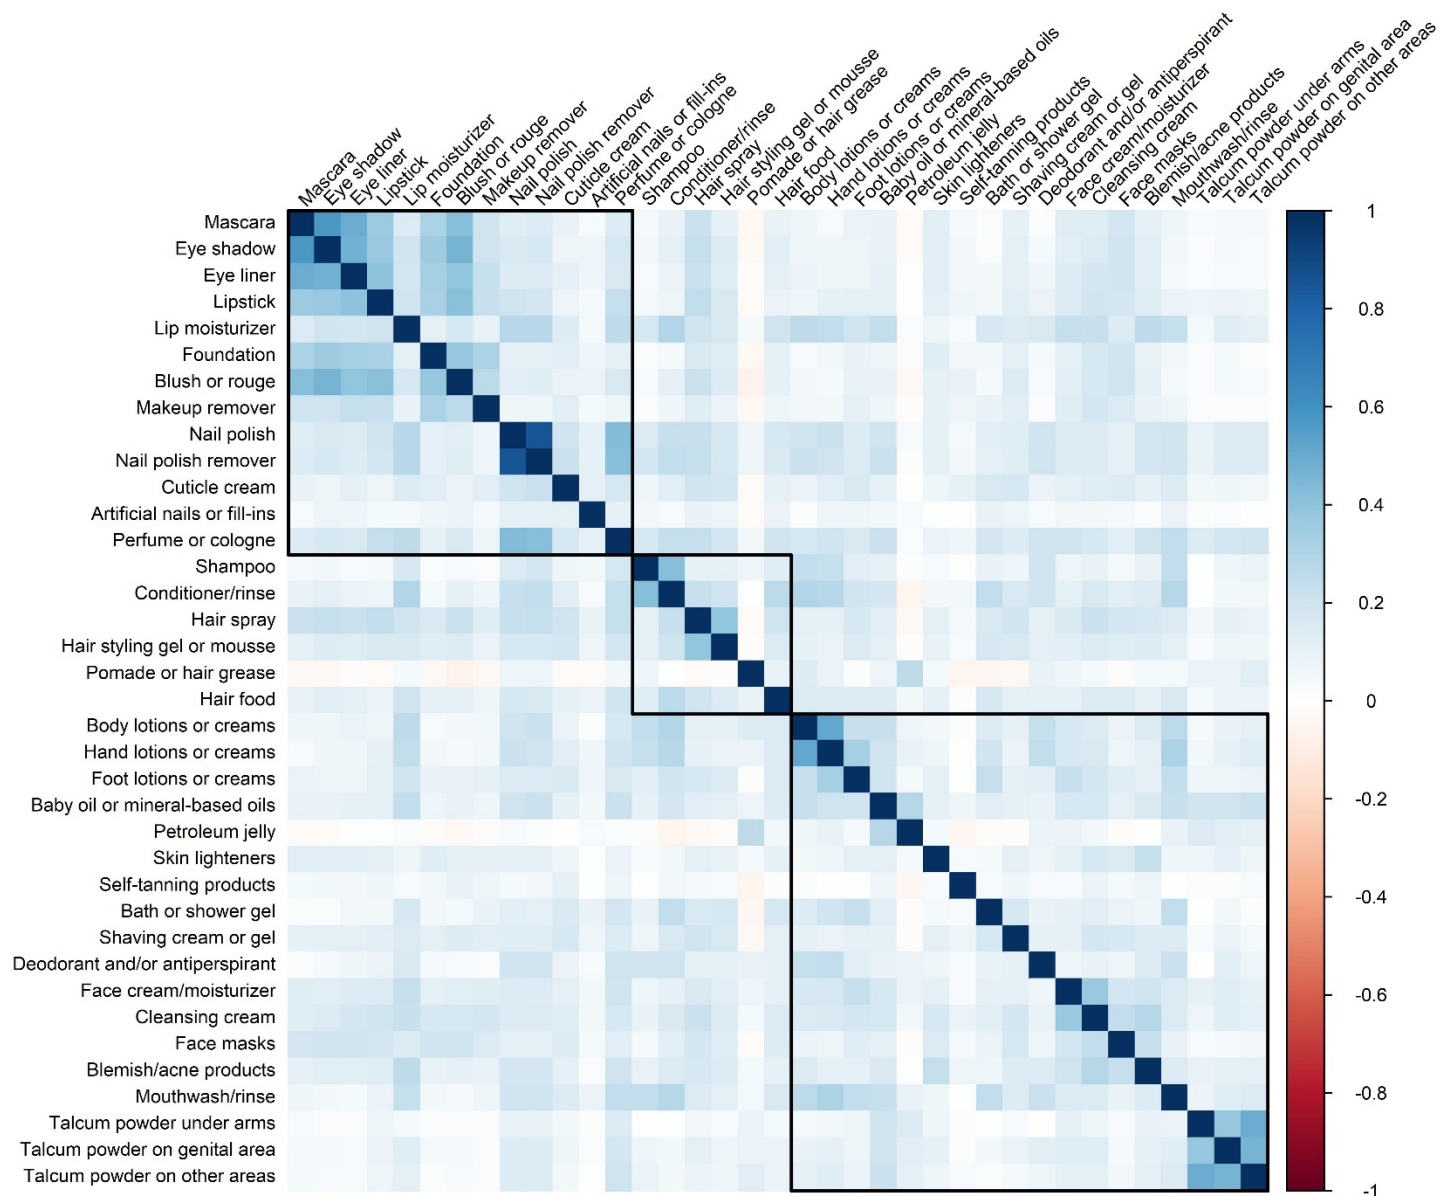

**Figure S3. Spearman correlation coefficient matrix for self-reported frequency of personal care product use during the ages of 10 to 13 years among Black or African American Sister Study participants (n=4,049).** Numeric data used to generate this figure can be found in Excel Table S2.



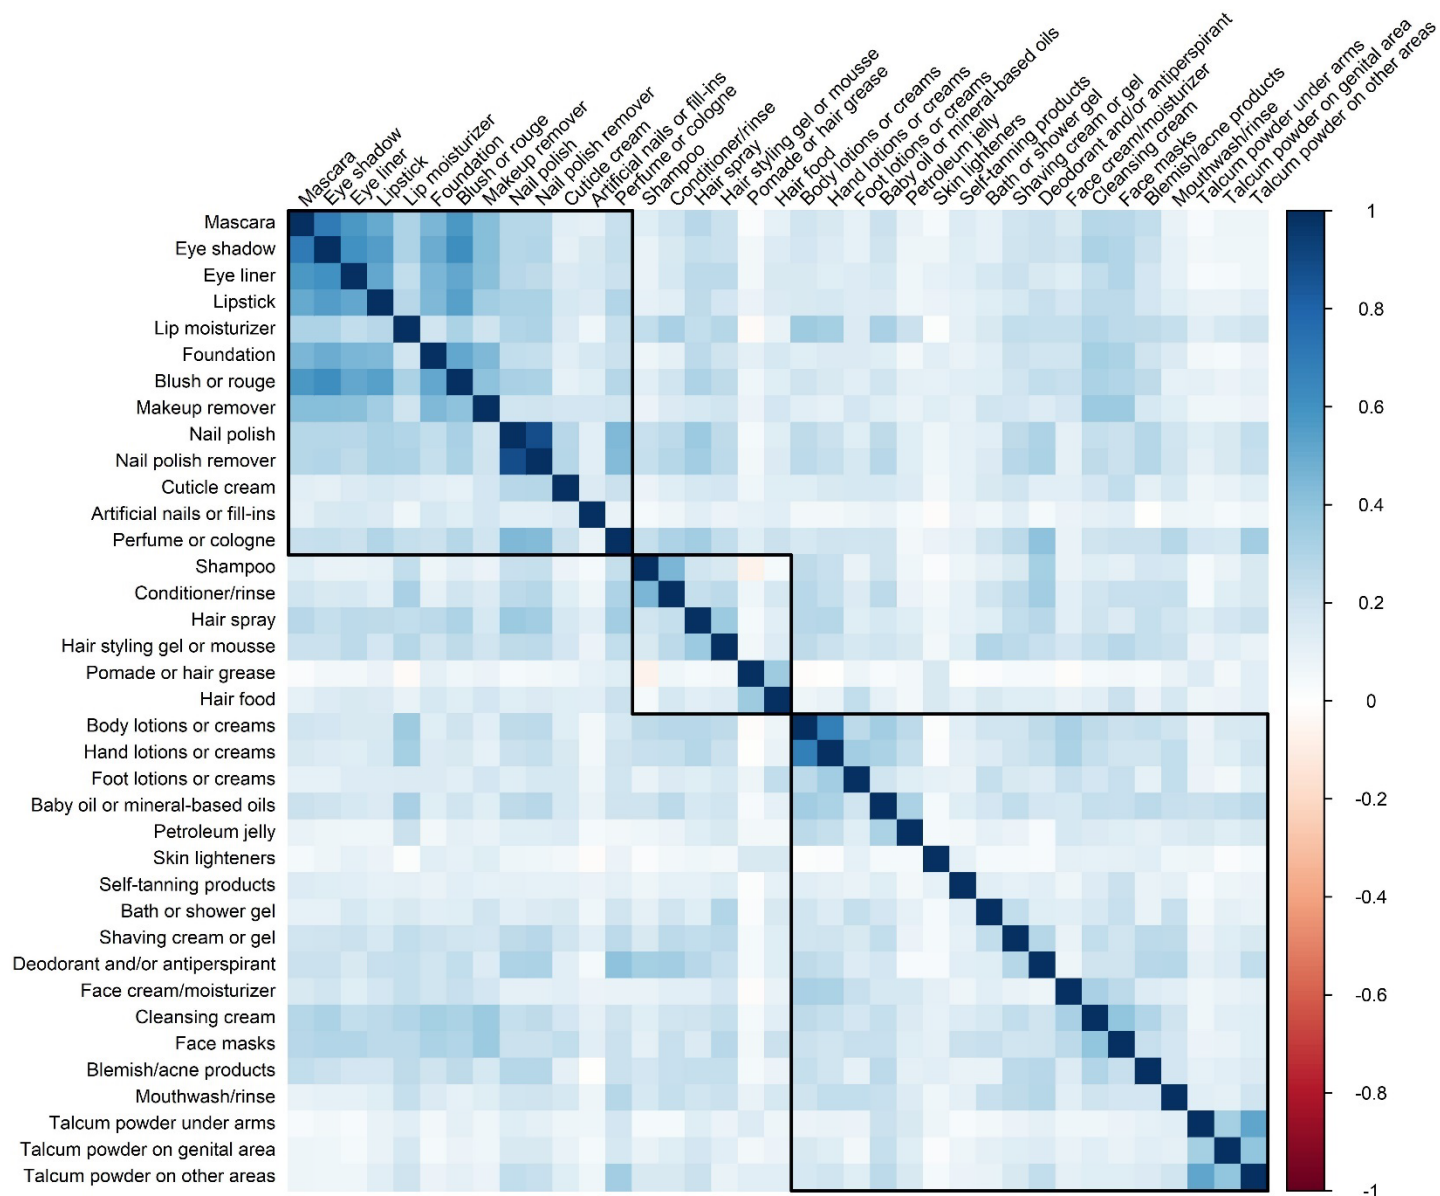

**Figure S4. Spearman correlation coefficient matrix for self-reported frequency of personal care product use during the ages of 10 to 13 years among non-Black Hispanic/Latina Sister Study participants (n=2,104).** Numeric data used to generate this figure can be found in Excel Table S3.

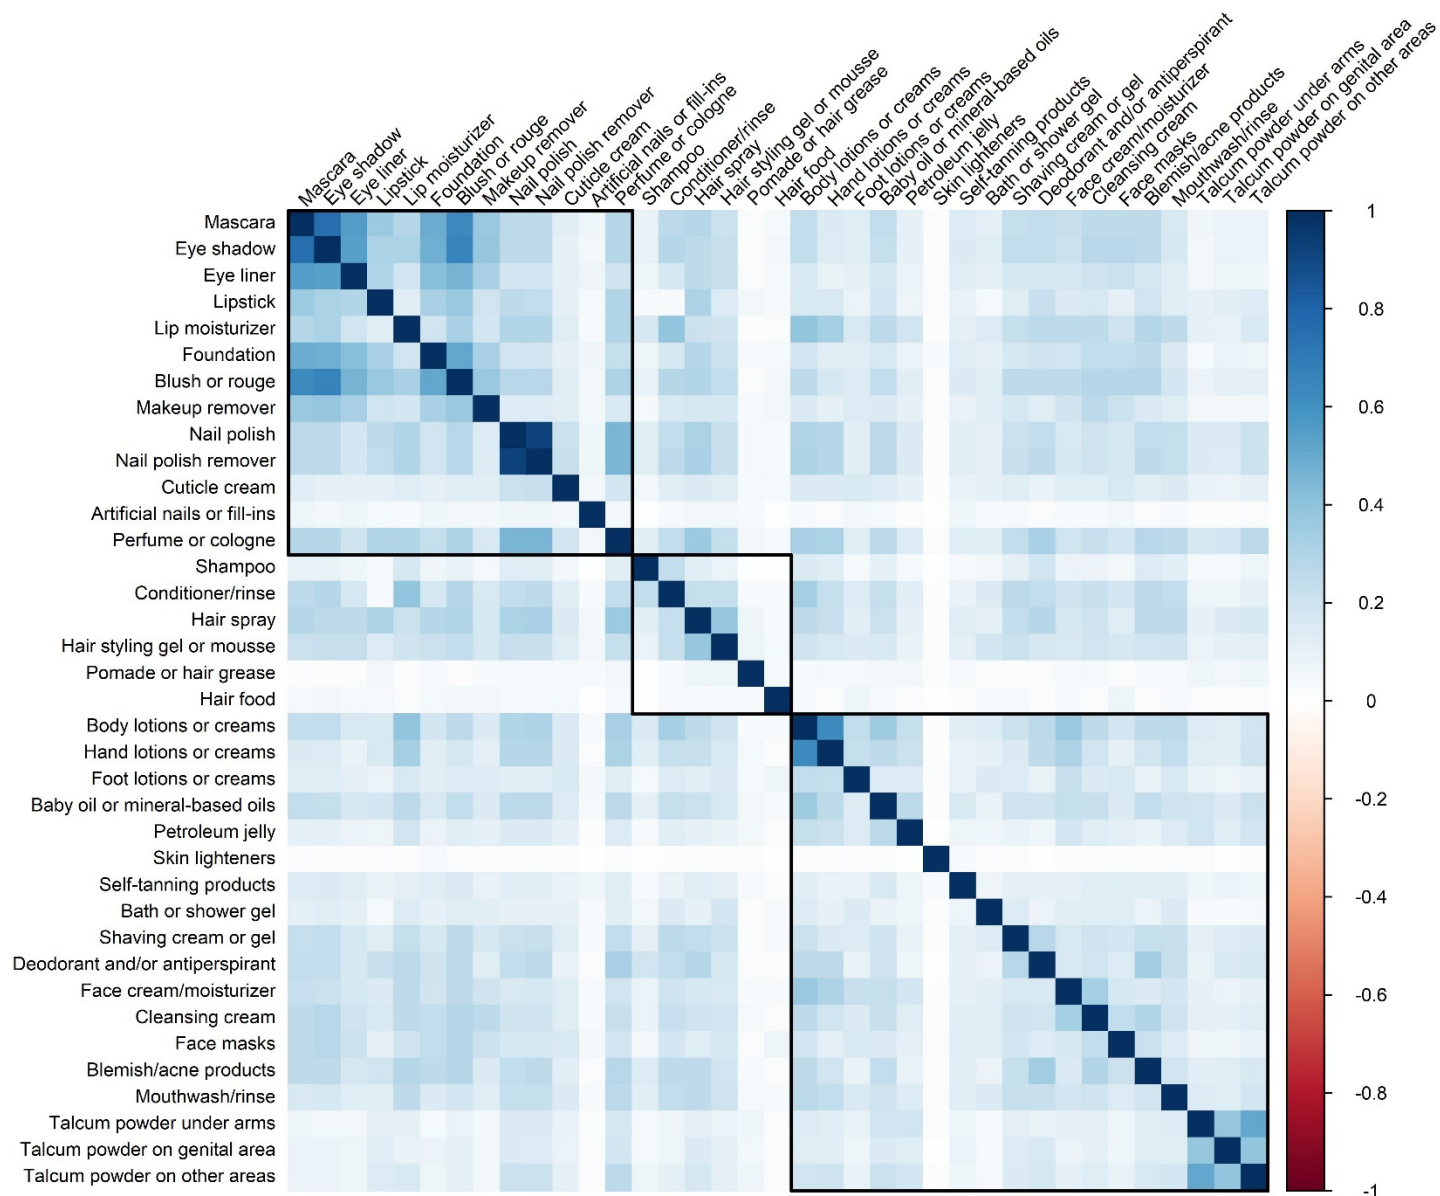

**Figure S5. Spearman correlation coefficient matrix for self-reported frequency of personal care product use during the ages of 10 to 13 years among non-Hispanic White Sister Study participants (n=39,312).** Numeric data used to generate this figure can be found in Excel Table S4.

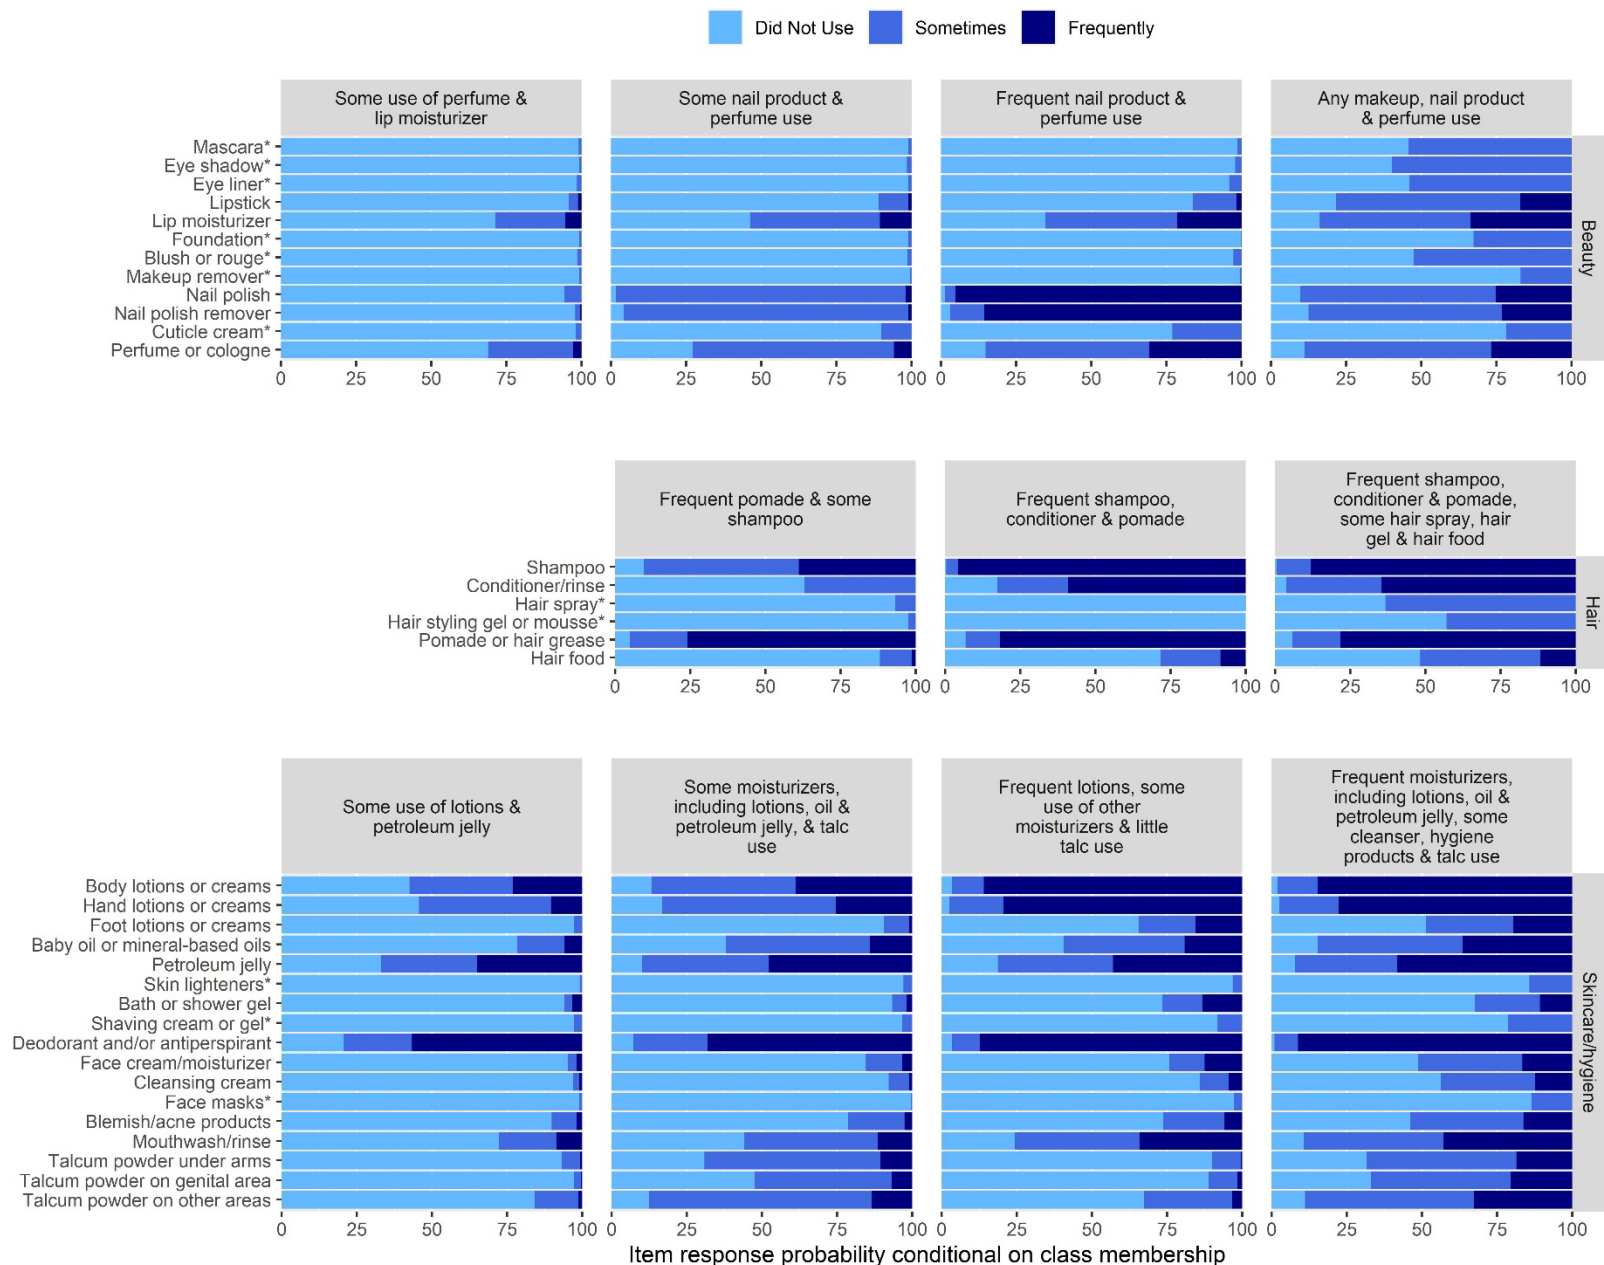

**Figure S6. Item response probabilities from selected latent class models of self-reported beauty, hair, and skincare/hygiene product use during the ages of 10 to 13 years among Black or African American Sister Study participants (n=4,049).** \* indicates 3-category product use variable was dichotomized for latent class analysis and response category labelled as “sometimes” in figure also includes “frequent” users (see Methods and Table S1 for more details). Numeric data used to generate this figure can be found in Excel Table S5.

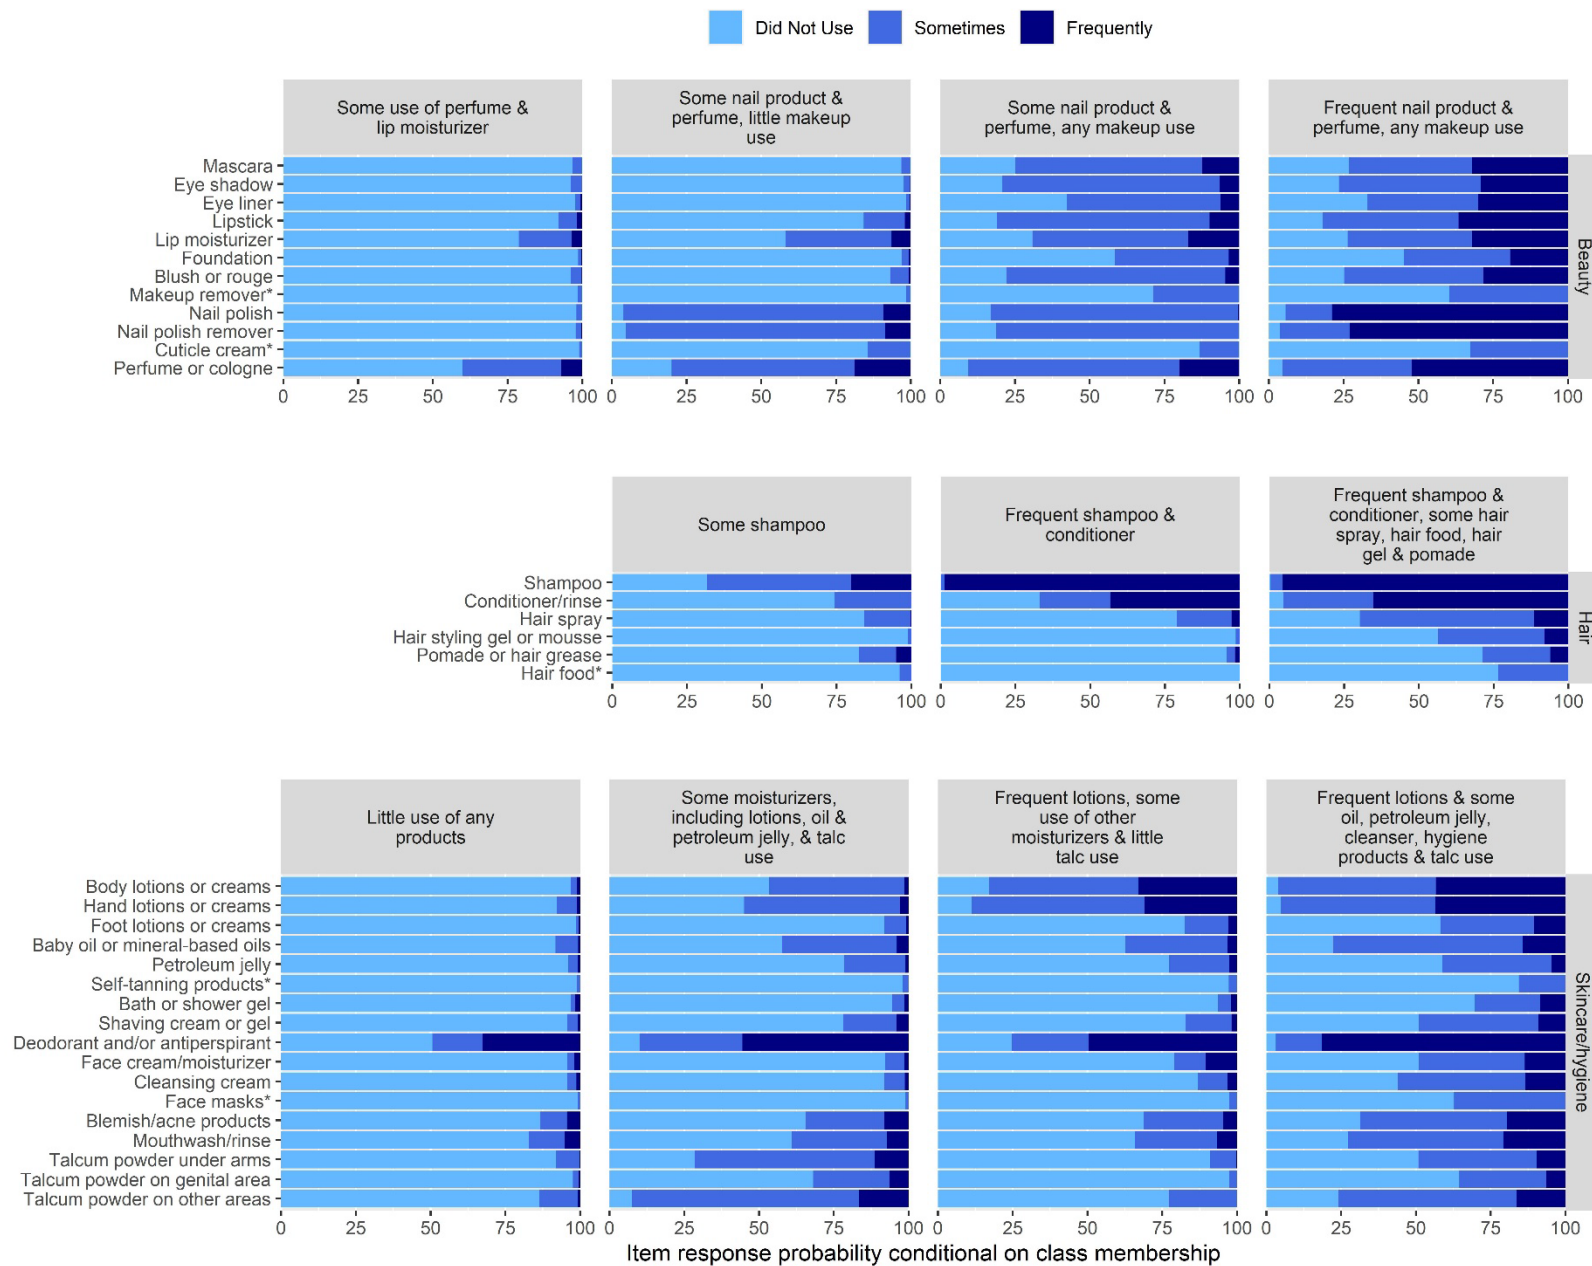

**Figure S7. Item response probabilities from selected latent class models of self-reported beauty, hair, and skincare/hygiene product use during the ages of 10 to 13 years among non-Black Hispanic/Latina Sister Study participants (n=2,104).** \* indicates 3-category product use variable was dichotomized for latent class analysis and response category labelled as “sometimes” in figure also includes “frequent” users (see Methods and Table S1 for more details). Numeric data used to generate this figure can be found in Excel Table S6.



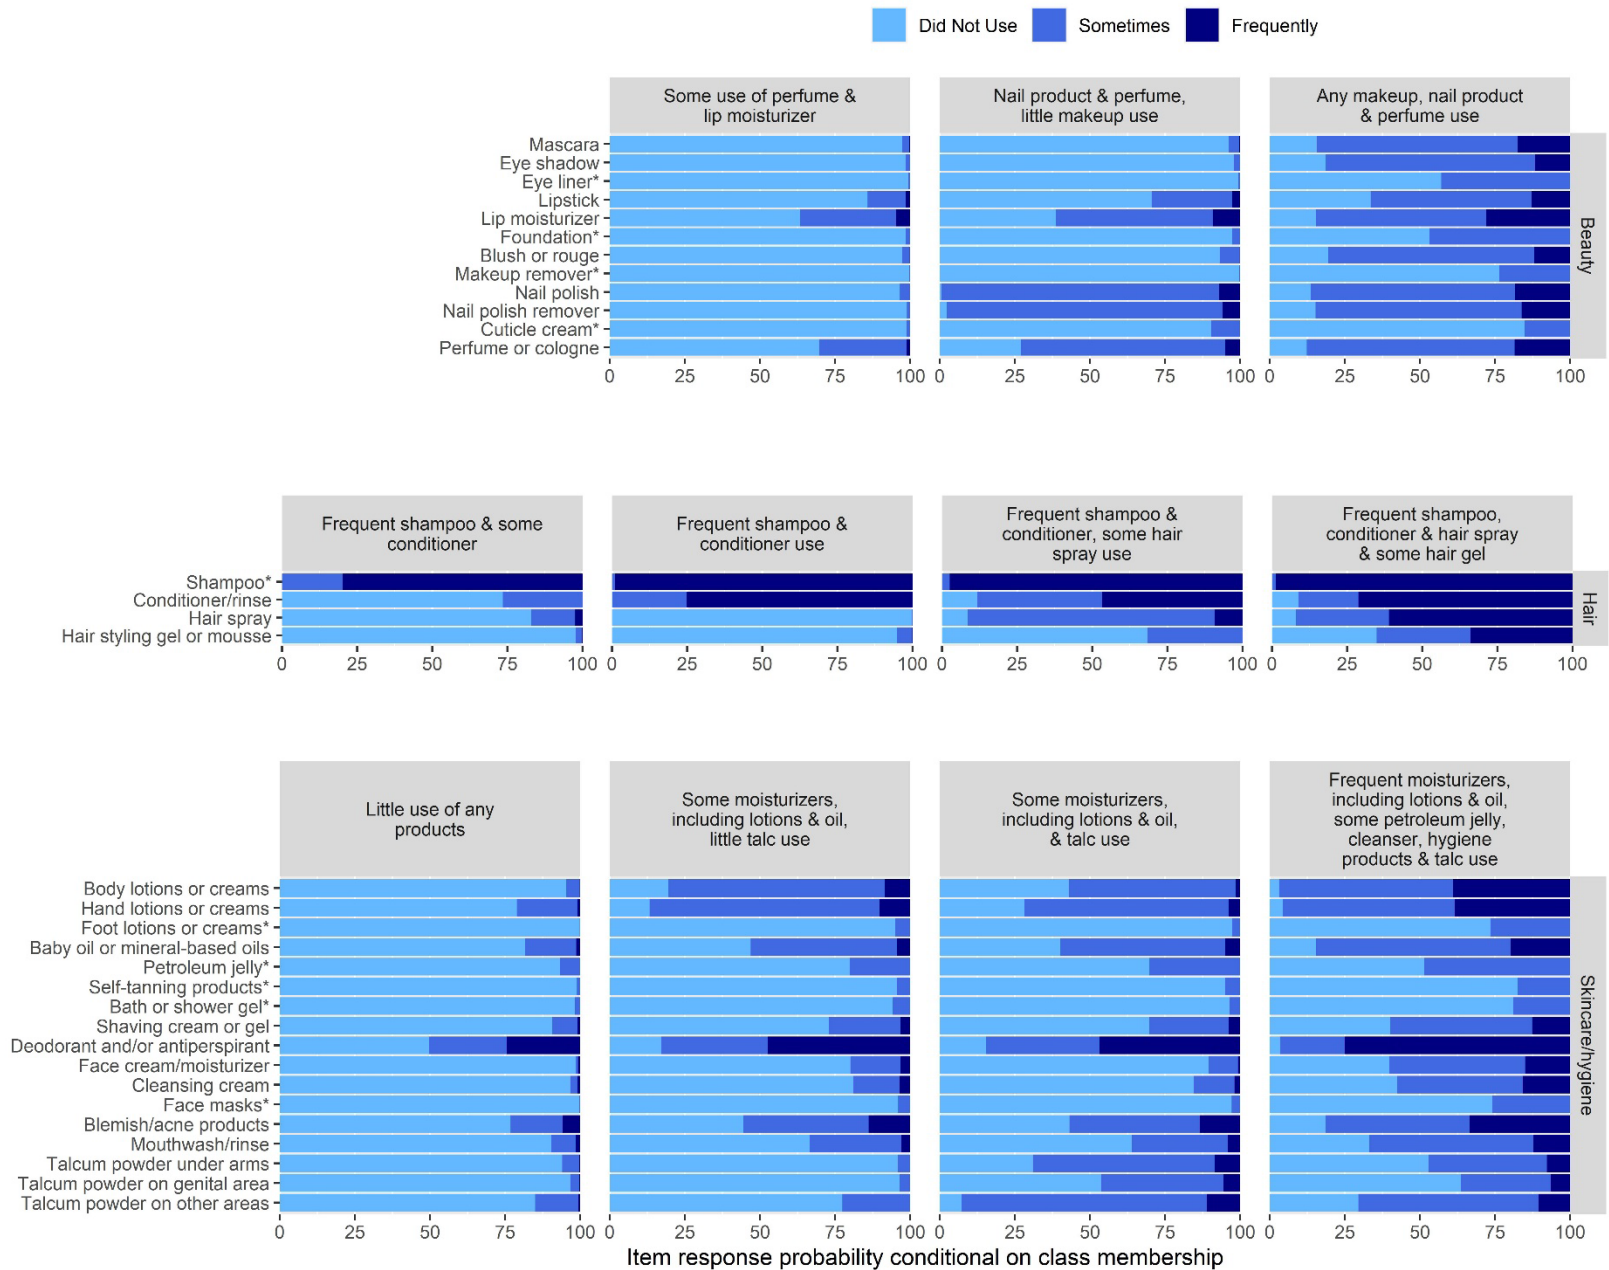

**Figure S8. Item response probabilities from selected latent class models of self-reported beauty, hair, and skincare/hygiene product use during the ages of 10 to 13 years among non-Hispanic White Sister Study participants (n=39,312).** \* indicates 3-category product use variable was dichotomized for latent class analysis and response category labelled as “sometimes” in figure also includes “frequent” users. For shampoo, “sometimes” category in figure includes those that did not use (see Methods and Table S1 for more details). Numeric data used to generate this figure can be found in Excel Table S7.
