# Supplementary material
Source: PubMed Central journal article supplement (PMC10836586)
Supplement: ehp13882.smcontents.508.pdf [file ehp13882.smcontents.508.pdf]

**Note to readers with disabilities:** *EHP* strives to ensure that all journal content is accessible to all readers. However, some figures and Supplemental Material published in *EHP* articles may not conform to [508 standards](#) due to the complexity of the information being presented. If you need assistance accessing journal content, please contact [ehp508@niehs.nih.gov](mailto:ehp508@niehs.nih.gov). Our staff will work with you to assess and meet your accessibility needs within 3 working days.

### **Supplemental Material**

#### **Personal Care Product Use during Puberty and Incident Breast Cancer among Black, Hispanic/Latina, and White Women in a Prospective US-Wide Cohort**

Mandy Goldberg, Che-Jung Chang, Kemi Ogunsina, Katie M. O'Brien, Kyla W. Taylor, Alexandra J. White, and Dale P. Sandler

#### **Table of Contents**

**Table S1.** Indicators of fit for race and ethnicity-specific latent class models of self-reported beauty, hair, and skincare/hygiene product use during the ages of 10 to 13 years in the Sister Study.

**Table S2.** Missing data on self-reported use of each personal care product during the ages of 10 to 13 years among Black or African American, non-Black Hispanic/Latina, and non-Hispanic White women in the Sister Study.

**Table S3.** Participant characteristics among eligible Black or African American, non-Black Hispanic/Latina, and non-Hispanic White participants and those excluded from the analyses in the Sister Study.

**Table S4.** Associations between latent classes of self-reported personal care product use during the ages of 10 to 13 years and incident breast cancer among Black or African American, non-Black Hispanic/Latina, and non-Hispanic White women in the Sister Study with additional adjustment for age at thelarche and weight relative to peers at age 10 years.

**Table S5.** Associations between race- and ethnicity-specific latent classes of self-reported personal care product use during the ages of 10 to 13 years and incident breast cancer by menopausal status in the Sister Study.

**Table S6.** Associations between race- and ethnicity-specific latent classes of self-reported personal care product use during the ages of 10 to 13 years and incident breast cancer by estrogen receptor (ER) status in the Sister Study.

**Table S7.** Associations between race- and ethnicity-specific latent classes of self-reported personal care product use during the ages of 10 to 13 years and incident breast cancer by tumor invasiveness in the Sister Study.

**Table S8.** Associations between latent classes of self-reported personal care product use during the ages of 10 to 13 years and incident breast cancer by timing of thelarche among non-Hispanic White women in the Sister Study.

**Table S9.** Associations between self-reported use of single beauty products during the ages of 10 to 13 years and incident breast cancer by race and ethnicity in the Sister Study, additionally adjusted for number of beauty products used during the ages of 10 to 13 years to address confounding by co-exposure to other products.

**Table S10.** Associations between self-reported use of single hair products during the ages of 10 to 13 years and incident breast cancer by race and ethnicity in the Sister Study, additionally adjusted for number of hair products used during the ages of 10 to 13 years to address confounding by co-exposure to other products.

**Table S11.** Associations between self-reported use of single skincare/hygiene products during the ages of 10 to 13 years and incident breast cancer by race and ethnicity in the Sister Study, additionally adjusted for number of skincare/hygiene products used during the ages of 10 to 13 years to address confounding by co-exposure to other products.

**Table S12.** Sensitivity analyses for the associations between self-reported latent classes of product use and use of individual products during the ages of 10 to 13 years with incident breast cancer among Black or African American participants in the Sister Study, restricted to participants who identify as monoracial and non-Latina (n=3,697).

**Figure S1.** Flow chart of eligible Sister Study participants for this analysis.

**Figure S2.** Heatmap of Spearman correlation coefficients ( $\rho$ ) between self-reported frequency of personal care product use during the ages of 10 to 13 years and covariates by race and ethnicity in the Sister Study.

**Figure S3.** Spearman correlation coefficient matrix for self-reported frequency of personal care product use during the ages of 10 to 13 years among Black or African American Sister Study participants (n=4,049).

**Figure S4.** Spearman correlation coefficient matrix for self-reported frequency of personal care product use during the ages of 10 to 13 years among non-Black Hispanic/Latina Sister Study participants (n=2,104).

**Figure S5.** Spearman correlation coefficient matrix for self-reported frequency of personal care product use during the ages of 10 to 13 years among non-Hispanic White Sister Study participants (n=39,312).

**Figure S6.** Item response probabilities from selected latent class models of self-reported beauty, hair, and skincare/hygiene product use during the ages of 10 to 13 years among Black or African American Sister Study participants (n=4,049).

**Figure S7.** Item response probabilities from selected latent class models of self-reported beauty, hair, and skincare/hygiene product use during the ages of 10 to 13 years among non-Black Hispanic/Latina Sister Study participants (n=2,104).

**Figure S8.** Item response probabilities from selected latent class models of self-reported beauty, hair, and skincare/hygiene product use during the ages of 10 to 13 years among non-Hispanic White Sister Study participants (n=39,312).

**Additional File-** Excel Document
